1  
2 **Hypermethylation in *Cryptococcus* reveals a**  
3 **novel pathway to 5-fluorocytosine (5FC) resistance**  
4

5 R. Blake Billmyre<sup>1†§</sup>, Shelly Applen Clancey<sup>1§</sup>, Lucy X. Li<sup>2</sup>, Tamara L. Doering<sup>2</sup>, and  
6 Joseph Heitman<sup>1\*</sup>  
7

8  
9 <sup>1</sup>Department of Molecular Genetics and Microbiology, Duke University Medical Center,  
10 Durham, NC, USA

11 <sup>2</sup>Department of Molecular Microbiology, Washington University School of Medicine, Saint  
12 Louis, Missouri 63110  
13  
14  
15  
16  
17  
18  
19  
20  
21  
22  
23  
24  
25  
26  
27  
28

29 § These authors contributed equally to this work.  
30

31 † Present address:

32 Stowers Institute for Medical Research

33 1000 E 50<sup>th</sup> St.

34 Kansas City, MO 64110, USA  
35

36 \*Corresponding author:

37 Room 322 CARL Building

38 Box 3546 Research Drive

39 Department of Molecular Genetics and Microbiology

40 Duke University Medical Center, Durham, NC 27710, USA

41 Email: [heitm001@duke.edu](mailto:heitm001@duke.edu)

42 Phone: (919) 684-2824

43 Fax: (919) 684-5458  
44

## 45 **Abstract**

46 Drug resistance is a critical challenge in treating infectious disease. For fungal infections, this  
47 issue is exacerbated by the limited number of available and effective antifungal agents. Patients  
48 infected with the fungal pathogen *Cryptococcus* are most effectively treated with a combination  
49 of amphotericin B and 5-fluorocytosine (5FC). Infections frequently develop resistance to 5FC  
50 although the mechanism of this resistance is poorly understood. Here we show that resistance is  
51 acquired more frequently in isolates with defects in DNA mismatch repair that confer an elevated  
52 mutation rate. Natural isolates of *Cryptococcus* with mismatch repair defects have recently been  
53 described and defective mismatch repair has been reported in other pathogenic fungi. In addition,  
54 whole genome sequencing was utilized to identify mutations associated with 5FC resistance in  
55 vitro. Using a combination of candidate-based Sanger and whole genome Illumina sequencing,  
56 the presumptive genetic basis of resistance in 10 independent isolates was identified, including  
57 mutations in the known resistance genes *FUR1* and *FCY2*, as well as a novel gene, *UXS1*.  
58 Mutations in *UXS1* lead to accumulation of a metabolic intermediate that appears to suppress  
59 toxicity of both 5FC and its toxic derivative 5FU. Interestingly, while a *UXS1* ortholog has not  
60 been identified in other fungi like *Saccharomyces cerevisiae*, where the mechanisms underlying  
61 5FC and 5FU resistance were elucidated, a *UXS1* ortholog is found in humans, suggesting that  
62 mutations in *UXS1* may also play a role in resistance to 5FU in its role as a human cancer  
63 chemotherapeutic.

64

## 65 **Introduction**

66           One of the key challenges of the 21<sup>st</sup> century is the emergence and reemergence of  
67 pathogens. Opportunistic fungal pathogens comprise an important component of this problem as  
68 they infect the rapidly expanding cohort of immunocompromised patients [1]. These pathogens  
69 are responsible for millions of infections annually, with substantial mortality. Among the most  
70 dangerous are *Cryptococcus* species that cause approximately 220,000 infections a year, with  
71 more than 181,000 attributable deaths [2]. Cryptococcosis is particularly prominent in Sub-  
72 Saharan Africa, where the HIV/AIDS epidemic has resulted in a large population of susceptible  
73 individuals. Cryptococcosis is treated most effectively using a combination of 5-fluorocytosine  
74 (5FC) and amphotericin B [3,4]. However, in the parts of Africa where patients are most  
75 commonly afflicted with cryptococcosis, the medical infrastructure is insufficient to allow  
76 treatment with the highly toxic amphotericin B component of this dual therapy. Instead patients  
77 are typically treated with fluconazole monotherapy, with limited success. Excitingly, recent  
78 studies have shown that 5FC can be effectively paired with fluconazole to replace amphotericin  
79 B for treatment of patients in Africa [5]. However, 5FC is not yet approved or available for  
80 treatment in any African countries.

81           5FC acts as a prodrug, which enters cells via the cytosine permease Fcy2. 5FC itself is  
82 not toxic, but upon uptake into fungal cells, it is converted into toxic 5-fluorouridine (5FU) by  
83 cytosine deaminase, an enzyme that is not present in human cells [6]. In *Cryptococcus*, and other  
84 fungi, cytosine deaminase is encoded by the *FCY1* gene. 5FU is then further processed by the  
85 product of the *FUR1* gene, a uracil phosphoribosyltransferase, and inhibits both DNA and  
86 protein synthesis. Resistance is well understood in other fungal pathogens, like *Candida*  
87 *albicans*, where loss of function mutations in *FCY1*, *FCY2*, and *FUR1* can mediate resistance [7].

88 In *Candida lusitanae*, mutations in *FURI* can be readily distinguished from mutations in *FCY1*  
89 and *FCY2* because only *fur1* mutations result in cross-resistance to 5FU [8]. Likewise, in  
90 *Candida dubliniensis*, natural missense *fur1* mutations affect both 5FC and 5FU resistance [9].  
91 However, little work has been conducted on 5FC resistance directly in *Cryptococcus*. One of the  
92 few early studies suggested that reductions in *FURI* activity may be linked to resistance to 5FC  
93 based on a high frequency of cross-resistance to 5FU [10]. However, this study took place prior  
94 to the cloning or sequencing of the *FURI* gene in *Cryptococcus* and attribution of resistance to  
95 *FURI* was based only on cross-resistance to 5FU. More recent studies of 5FC resistant  
96 *Cryptococcus bacillisporus* isolates found no mutations in *FCY1*, *FURI*, or any of three putative  
97 *FCY2* paralogs that explained drug resistance [11].

98         Recent work has demonstrated one source of increased rates of resistance to antifungal  
99 drugs in *Cryptococcus*: defects in the DNA mismatch repair pathway [12,13]. Natural isolates  
100 with DNA mismatch repair defects have been identified in both an outbreak population of  
101 *Cryptococcus deuterogattii* [12,14] and in *Cryptococcus neoformans* [13,15]. Defects in  
102 mismatch repair are also common in other human fungal pathogens, including *Candida glabrata*  
103 [16]. Depending on the population studied, multidrug resistance is sometimes linked to the  
104 hypermutator state in *C. glabrata* [17,18]. Here we demonstrate that DNA mismatch repair  
105 defects also enable rapid resistance to 5FC in *C. deuterogattii* (previously known as *C. gattii*  
106 VGII [19–21]). We then utilize whole genome Illumina sequencing, in combination with  
107 candidate-based Sanger sequencing, to identify the genetic basis for drug resistance in 10  
108 independent isolates. We attribute resistance to mutations in *FURI* and unexpectedly, we also  
109 identify a novel pathway of resistance to 5FC involving mutations in the pathway responsible for  
110 producing the capsule, a core component of Cryptococcal virulence.

111



## 112 **Results**

113           In a previous study, we demonstrated that mismatch repair mutations conferred increased  
114 rates of resistance to the antifungal drugs FK506 and rapamycin [12]. Because these  
115 hypermutator strains are found among both environmental and clinical isolates, here we tested if  
116 a hypermutator state could also confer resistance to one of the front-line drugs used to treat  
117 Cryptococcosis: 5-fluorocytosine (5FC). A semi-quantitative swabbing assay was first employed  
118 to demonstrate that deletions of the mismatch repair gene *MSH2* in *Cryptococcus deuterogattii*  
119 confer an elevated rate of resistance to 5FC (Figure 1A). This result was confirmed using a  
120 quantitative fluctuation assay approach (Figure 1B). This assay revealed a greater than 15-fold  
121 increase in the generation of resistance to 5FC in *msh2* $\Delta$  mismatch repair defective mutants.  
122 Similarly, a simple spreading assay using VGIIa-like strains that had previously been found to  
123 harbor an *msh2* nonsense allele [12] demonstrated a much higher rate of resistance to both 5FC  
124 and 5FU than in the VGIIa non-hypermutator strains (Supplemental Figure 1).

125           In previous studies, mutator alleles in *C. deuterogattii* were not found to be generally  
126 advantageous in rich media [12]. However, under stressful conditions, such as drug challenge  
127 with FK506 and rapamycin, mutator alleles were highly beneficial. A competitive growth  
128 experiment was utilized to test the same concept with 5FC. Mutator strains became resistant to  
129 5FC at a higher rate and thus rapidly outcompeted wildtype strains (Figure 2). However, in the  
130 absence of added stress, the mutator alleles showed no such advantage. This result suggests that  
131 drug challenge during infection may select for strains with elevated mutation rates that are able  
132 to acquire drug resistance more rapidly.

133           In other fungi, resistance to 5FC is typically mediated by mutations in one of three genes:  
134 *FCY1*, *FCY2*, or *FURI* [7,8,10,22]. As described above, mutations in *FCY1* and *FCY2* are

135 typically distinguishable from *fur1* mutations because mutations in *FUR1* confer resistance not  
136 only to 5FC but also to 5FU. In contrast, *fcy1* and *fcy2* mutations confer resistance to only 5FC.  
137 To define the mechanism underlying 5FC resistance in *C. deuterogattii*, 29 resistant colonies  
138 were isolated and tested, originating from the wildtype (R265, 9 colonies) and from two  
139 independent *msh2* $\Delta$  mutants derived in the R265 background (RBB17, 10 colonies and RBB18,  
140 10 colonies). Cultures were started from independent colonies and a single resistant colony was  
141 selected from each culture, so that only one resistant isolate is derived from any original colony  
142 derived from the frozen stock. All of the 5FC resistant isolates (Table 1) acquired were cross-  
143 resistant to 5FU (29/29) (Figure 3A), suggesting that resistance to 5FC in *Cryptococcus*  
144 *deuterogattii* was most commonly mediated by mutations in *FUR1*.

145         However, when the *FUR1* gene was sequenced in this set of 5FC/5FU resistant isolates,  
146 unexpectedly, only three out of 29 isolates (10.3%) were found to have sustained mutations in  
147 *FUR1* (R265-3, R265-4, and R265-6) (Table 1). Because *fur1* mutations were the only known  
148 cause of 5FC/5FU cross-resistance, we performed whole genome Illumina sequencing on a  
149 subset of the remaining isolates to identify unknown genes underlying resistance. We sequenced  
150 3 additional R265 isolates, 8 additional RBB17 isolates, and 9 additional RBB18 isolates, for a  
151 total of 20 5FC and 5FU resistant isolates.

152         From the sequenced genomes, reads were aligned to the R265 reference genome and  
153 SNPs and indels were identified. This analysis revealed that some of the presumed independent  
154 isolates were in fact siblings. Four groups of siblings existed (RBB17-3 and RBB17-4; RBB17-5  
155 and RBB17-8; RBB18-2, RBB18-4, and RBB18-5; RBB18-6 and RBB18-9), resulting in a total  
156 of 3 independent R265 genomes, 6 independent RBB17 genomes, and 6 independent RBB18  
157 genomes.

158           Of these 15 independent genome sequences, two contained unambiguous mutations in  
159 *FURI*. One strain (R265-2), for which PCR amplification of the *FURI* locus had failed, showed  
160 an approximately 20 kb deletion. One end of the deletion lies within *FURI*, consistent with the  
161 failed PCR. The other end of the deletion fell within a sequencing gap of the annotated V2 R265  
162 reference genome. To identify the precise location of this second breakpoint, reads from R265-2  
163 were mapped to a recent Nanopore and Illumina hybrid assembly of the R265 strain [23].  
164 Interestingly, the second breakpoint was found within a gene encoding a weak paralog of *FURI*  
165 ( $5 \times 10^{-10}$  protein BLAST e-value). This paralog (CNBG\_4055) is also present in *C. neoformans*  
166 (CNAG\_2344), suggesting that if it arose via duplication, it was before the last common ancestor  
167 to both species. Given that deletion of *FURI* confers resistance to 5FC and 5FU, it is unlikely  
168 that this paralog performs the same function as Fur1 (Figure 3A). Despite the protein similarity,  
169 no obvious nucleotide homology was found that may have mediated this large deletion  
170 conferring 5FC resistance. In fact, the *FURI* paralog is inverted relative to *FURI*, reducing the  
171 likelihood that remnant homology may have generated a region susceptible to frequent  
172 homology-mediated deletion of *FURI* that would yield the type of regional deletion observed  
173 here.

174           The second *fur1* mutation discovered by whole genome sequencing was a single base  
175 deletion that introduced a frameshift (R265-1) that had not initially been detected via Sanger  
176 sequencing. A Gly190Asp *fur1* missense mutation was also identified in the *msh2* mutant  
177 background (RBB17-5 and RBB17-8 sibling pair) (Table 1). However, this mutation was present  
178 in the sequencing of each strain at approximately 50% frequency, which would typically suggest  
179 a heterozygous variant. Because the starting strains used were haploid, and there was no  
180 indication of local duplication or any other indication of heterozygous variants in the genomes of

181 these strains, it seems unlikely that these data are indicative of a heterozygous mutation. One  
182 alternate explanation is that the strains sequenced were mixed cultures or that the *fur1* mutation  
183 reverted during the expansion of the culture for whole genome sequencing, which was not  
184 performed under selection. A test of individual colonies from the frozen culture of both sibling  
185 strains showed that 10 out of 10 colonies from each strain demonstrated both 5FC and 5FU  
186 resistance, suggesting that these strains were either a mixed culture of two different mutations  
187 that both confer resistance to 5FU and 5FC, or that *fur1* mutations were lost during outgrowth for  
188 sequencing (Supplemental Figure 2).

189 A Trp167STOP mutation in *FCY2* (CNBG\_3227) was also detected in the sequenced set  
190 (RBB18-2, RBB18-4, and RBB18-5 sibling strains). While one of these mutations was nearly  
191 unambiguous (84% alternate allele, RBB18-4), RBB18-2 and RBB18-5 exhibited more mixed  
192 sequence at this locus. When individual colonies were isolated and retested from RBB18-2 and  
193 RBB18-5, they all showed resistance to both 5FC and 5FU (Supplemental Figure 2). Mutations  
194 in *FCY2* were particularly unexpected because in other fungi they do not confer resistance to  
195 5FU and because there are 2 additional paralogs of *FCY2* present in the *Cryptococcus* genome.  
196 We attempted to test the ortholog of *FCY2* from *Cryptococcus neoformans* using a deletion  
197 collection strain but found that the mutant in the collection retained a functional *FCY2* allele. It is  
198 possible that this mutation may be a false positive, especially because all three of these sibling  
199 strains contained a second mutation in a gene that also plays a role in 5FC and 5FU resistance  
200 (below).

201 In total, out of 29 original 5FC resistant strains (Table 1), six independent *fur1* mutations  
202 were identified using Sanger and Illumina sequencing. One independent *fcy2* mutation was  
203 identified by Illumina sequencing. We did not identify any *fcy1* mutations, although *fcy1*

204 mutations confer resistance to 5FC in *Cryptococcus neoformans* (Supplemental Figure 3). In  
205 total, 13 sequenced genomes representing 11 independent isolates remained with no mutations in  
206 any genes known to have a role in 5FC or 5FU resistance. These genomes were examined to  
207 identify novel candidate mutations. To distinguish causal variants from background mutations,  
208 candidate genes were required to be mutated in at least two different independent isolates.  
209 Variant impact was also scored using SNPeff [24] and mutations were not considered if  
210 predicted to have low impact (i.e., synonymous, intronic, or non-coding variants). Mutations of  
211 moderate or higher impact were identified at a total of 56 sites (Supplemental Table 3). To  
212 further prioritize, we specifically focused on mutations that were present in isolates from more  
213 than one of the parental backgrounds. We identified *UXS1*, which sustained four novel mutations  
214 in seven isolates from two parental backgrounds (Figure 3B).

215 *UXS1* encodes the enzyme that converts UDP-glucuronic acid to UDP-xylose [25]. This  
216 pathway is critical for the formation of the capsule, a core virulence trait of *Cryptococcus*, and  
217 for synthesis of other glycoconjugates. There is no *UXS1* ortholog in either *Saccharomyces*  
218 *cerevisiae* or *Candida albicans*, where many of the resistance mechanisms for 5FC were  
219 elucidated. The mutations in *UXS1* included a single base deletion in a 3 T homopolymer (R265-  
220 5), a single base insertion in a 7 C homopolymer (RBB18-8), and a missense mutation  
221 (Tyr217Cys, RBB18-6 and RBB18-9 sibling pair) that, like some of the previously identified  
222 *FURI* mutations, displayed mixed sequences at the mutation site (Figure 3B, Table 1). Finally, a  
223 *uxs1* mutation (Asp306Gly) was identified in the three sibling isolates that also had *fcy2*  
224 mutations (RBB18-2, RBB18-4, and RBB18-5 siblings). Both the *uxs1* and *fcy2* mutations were  
225 not present in 100% of the reads. However, both mutant alleles had allele frequencies >50%,  
226 suggesting the genome sequence was not just a mix of a *uxs1* mutant strain and an *fcy2* mutant

227 strain, but instead that both mutations were present in at least a portion of the cells in the culture.  
228 Among the sequenced isolates, mixed allele frequencies appeared only in the hypermutator  
229 strains, suggesting that the rapid rate of mutation in these isolates may have contributed to  
230 difficulties acquiring or maintaining a clonal population during the expansion of cultures used to  
231 prepare DNA for whole genome sequencing, although more hypermutator strains were  
232 sequenced than wildtype strains. In sum, 9 sequenced genomes representing 8 independent  
233 isolates remained for which we were unable to identify a mutation that conferred resistance to  
234 5FC and 5FU, all derived from *msh2* mutant isolates.

235 To confirm the role of *uxs1* mutation in resistance to 5FC and 5FU, a *uxs1* deletion  
236 available from a *C. neoformans* deletion collection was employed (Figure 4A). This *uxs1*Δ strain  
237 was completely resistant to both drugs, suggesting that all three alleles isolated were likely loss  
238 of function mutations because they shared a drug resistance phenotype with the null mutant. We  
239 next sought to genetically define the mechanism by which drug resistance may be mediated by  
240 loss of *uxs1* function. Multiple models were considered to explain why 5FC/5FU toxicity would  
241 require Uxs1. The first was that Uxs1 directly converts 5FU into a toxic product. If so, Uxs1 and  
242 Fur1 would function in the same pathway, as either mutant independently confers drug  
243 resistance. This hypothesis was tested using an overexpression allele of *UXS1* that is driven by  
244 the actin promoter [26]. If this hypothesis were correct, we would expect to observe additional  
245 sensitivity conferred by the overexpression allele compared to wildtype. By reducing the amount  
246 of 5FU used to only 1 μg/mL, wildtype strains were only partially inhibited. However,  
247 introduction of an overexpression allele of *UXS1* did not increase sensitivity (Figure 4B). This  
248 suggests that Uxs1 does not act by converting 5FU or a 5FU derivative into a toxic product.

249 We next tested whether 5FC resistance in *uxs1* mutants may occur through an indirect  
250 effect of the role of Uxs1 in synthesis of UDP-xylose. UDP-xylose is the donor molecule for  
251 xylose addition to glycans, a process that primarily occurs in the secretory compartment. If  
252 xylosylation of an unknown glycoconjugate is required to mediate 5FC toxicity, mutation of  
253 *UXS1* would indirectly confer drug resistance. To test this, deletion mutants lacking transporters  
254 that move UDP-xylose into the secretory compartment (*uxt1*, *uxt2*, and a *uxt1 uxt2* double mutant  
255 [27]) or that lack Golgi xylosyl-transferases that act in protein, glycolipid, and polysaccharide  
256 synthesis (*cxt1* [28], *cxt2*, and a *cxt1 cxt2* double mutant) were analyzed. None of these mutants  
257 demonstrated any change in sensitivity to 5FC or 5FU (Figure 4C). However, these data did not  
258 rule out a requirement for a (previously undescribed) cytoplasmic xylosyl protein modification.  
259 To test this hypothesis, a mutant that cannot generate UDP-glucuronic acid, the immediate  
260 precursor for UDP-xylose synthesis was used. This mutant (*ugd1*) is somewhat growth impaired  
261 relative to wildtype and cannot grow on YNB media. However, it does grow, albeit poorly, on  
262 rich YPD media, where it clearly exhibited sensitivity to 5FC. This result demonstrated that  
263 xylose modification, in any cellular compartment, is not required for 5FC toxicity (Figure 4D).

264 The previous models ruled out the lack of UDP-xylose for synthetic processes as an  
265 explanation for 5FC resistance. Another result of the loss of *UXS1* function is the accumulation  
266 of UDP-glucuronic acid, the immediate precursor in the production of UDP-xylose. Past studies  
267 have shown that UDP-glucuronic acid accumulates to extremely high levels in *uxs1* mutant cells  
268 [29]. To test whether this mediates resistance, we generated a *uxs1 ugd1* double mutant, which  
269 should produce neither compound [29]. While the *uxs1 ugd1* mutant was growth impaired, like  
270 the *ugd1* single mutant, it was clearly sensitive to 5FC (Figure 4D). That *uxs1* mutants are 5FC  
271 resistant, whereas *uxs1 ugd1* double mutants are restored to 5FC sensitivity suggests that

272 accumulation of UDP-glucuronic acid in *uxsI* mutants mediates resistance to 5FC and 5FU

273 (Figure 5).

274

275



## 276 **Discussion**

277 Treating fungal diseases is complicated both by the limited number of drugs that  
278 effectively treat infection without harming the patient and by the rapid rate at which fungi  
279 develop resistance to the few drugs that are effective. 5FC is a particularly emblematic example  
280 of this issue, as it is highly efficacious with limited toxicity. Human cells lack the ability convert  
281 5FC to 5FU and toxicity is conferred only by the conversion of 5FC to the chemotherapeutic  
282 5FU by a patient's microbiota [30]. However, 5FC is ineffective when used for solo treatment  
283 because fungal resistance rapidly emerges. Here, we demonstrate that DNA mismatch repair  
284 mutants exhibit accelerated acquisition of resistance to 5FC. Evolutionary theory predicts that  
285 hypermutators should be rare in eukaryotic microbes because sex unlinks mutator alleles from  
286 the mutations they generate, eliminating the advantage of an elevated mutation rate and leaving  
287 only the general decrease in fitness from introduced mutations [31]. This result lends further  
288 support to the recent appreciation that mismatch repair mutants may be common in pathogenic  
289 fungi in part because treatment with antifungal drugs increases selection for mutations that  
290 generate resistance [12,13,15,16]. The potential instability observed in several of these mutations  
291 in *msh2* mutants may suggest the capacity to revert nonbeneficial mutations once drug treatment  
292 ends, particularly in the context of a pathogen like *Cryptococcus* that is primarily environmental.  
293 Previous work showed this type of direct reversion of an auxotrophic *ade2* mutation [12].

294 We explored the underlying genetic and genomic basis of 5FC resistance. The resistant  
295 mutants in *C. deuterogattii* selected here were cross-resistant to 5FU. Sanger and whole genome  
296 Illumina sequencing identified a presumptive genetic basis for drug resistance in 10 independent  
297 isolates. Analysis of resistance loci was relatively facile in wildtype strains, where an average of  
298 1.66 coding mutations were identified by whole genome sequencing, including the putative

299 resistance mutation, relative to the reference. However, this analysis was substantially more  
300 difficult in mutator strains where an average of 7.9 coding mutations were found per strain, with  
301 numerous additional noncoding or synonymous mutations. In addition, the phenomenon of  
302 mixed allele ratios in sequencing data was only observed in hypermutator strains. Likewise,  
303 sibling strains emerged from the selection, despite use of standard genetic best practices for  
304 isolating independent resistant mutants. This suggests that the initial freezer stock from each  
305 hypermutator strain had substantial existing mutations and population structure, which is not  
306 typically an issue for frozen *Cryptococcus* cultures. For the purposes of identifying the genetic  
307 basis of a trait that occurs at a high rate in wildtype, future studies would be advised to avoid  
308 mutations that increase mutation rate, as they contribute to background noise.

309         Mutations in *UXS1* are particularly interesting as a mechanism of resistance in  
310 *Cryptococcus* because *Uxs1* catalyzes the production of UDP-xylose, the donor molecule for  
311 essential components of Cryptococcal capsule polysaccharides. Strains lacking *UXS1* are  
312 hypocapsular with altered capsule structure [29]. In addition, *uxs1* mutants are avirulent in a  
313 murine tail-vein injection disseminated infection model [32]. This suggests that *uxs1* mutants  
314 might be unlikely to emerge during exposure to 5FC *in vivo*, even though they represent a  
315 substantial proportion of the resistant isolates observed in this study. Future studies examining  
316 the mechanisms of resistance during treatment with 5FC *in vivo* will provide further insights into  
317 the possible contribution of *uxs1* mutations to resistance in patients.

318         This study also illustrates the importance of examining drug resistance in the context of  
319 the pathogen being treated. Previous work in *C. albicans* and *S. cerevisiae* suggested that  
320 resistance would occur through mutations in *FURI*, but both species are evolutionarily distant  
321 from *Cryptococcus* and lack a *UXS1* ortholog. While these previous studies provided substantial

322 insight into 5FC toxicity, studies in the pathogen of interest are essential. Surprisingly, one set of  
323 sibling strains (RBB18-2, RBB18-4, RBB18-5) that were cross resistant to 5FU had mutations in  
324 the *FCY2* gene (CNBG\_3227), which in other species confers resistance to 5FC but not 5FU.  
325 Unexpected cross-resistance between 5FC and fluconazole has been previously observed in *fcy2*  
326 mutants of *Candida lusitaniae* but is proposed to occur through competitive inhibition of  
327 fluconazole uptake by 5FC that can no longer enter through Fcy2-mediated transport [8,33,34].  
328 *C. lusitaniae fcy2* mutants are not resistant to fluconazole without the addition of 5FC. In  
329 addition, multiple resistant strains were not assigned a presumptive causative mutation here and  
330 lacked mutations in any genes known to cause 5FC resistance from this or previous work (*FUR1*,  
331 *FCY1*, *FCY2*, and *UXS1*). Presumably unknown mechanisms are responsible for resistance to  
332 5FC and 5FU in these strains as well, either in pathways unique to *Cryptococcus* or potentially  
333 more broadly conserved.

334 In addition, *UXS1* mutations provide unexpected insight into interaction between  
335 nucleotide synthesis and generation of precursors for xylosylation. Surprisingly, accumulation of  
336 UDP-glucuronic acid appears to either inhibit the pyrimidine salvage pathway or activate  
337 thymidylate synthase (Figure 5). This suggests that UDP-glucuronic acid may have a role as a  
338 source of UDP for the cell, while UDP-xylose does not. While *UXS1* orthologs are not found in  
339 *C. albicans* or *S. cerevisiae*, which lack xylose modifications, there is a *UXS1* ortholog in  
340 humans. 5FU is commonly used as a chemotherapeutic drug [35], and resistance to 5FU is  
341 frequently associated with mutations in thymidylate synthase [36]. Data here suggest that *uxs1*  
342 mutations may be acting in a similar fashion to either de-repress thymidylate synthase or inhibit  
343 Fur1 (Figure 5). Further exploration of the role of Uxs1 orthologs in humans during 5FU  
344 chemotherapy may be of interest.



## 346 **Material and methods**

### 347 **Strains and media**

348           The strains and plasmids used in this study are listed in Table S1. The strains were  
349 maintained in glycerol stocks at -80°C and grown on rich YPD media at 30°C (Yeast extract  
350 Peptone Dextrose). Strains with selectable markers were grown on YPD containing 100 µg/mL  
351 nourseothricin (NAT) and/or 200 µg/mL G418 (NEO).

352

### 353 **Genome sequencing**

354           DNA was isolated for sequencing by expanding individual colonies to 50 mL liquid  
355 cultures in YPD at 30°C. Cultures were then frozen and lyophilized until dry. DNA was  
356 extracted using a standard CTAB extraction protocol as previously described [37]. Illumina  
357 paired-end libraries were prepared and sequenced by the University of North Carolina Next  
358 Generation Sequencing Facility. Raw reads are available through the Sequence Read Archive  
359 under project accession number PRJNA525019.

360

### 361 **Genome assembly and variant calling**

362           Reads were aligned to the V2 R265 reference genome [38] using BWA-MEM [39].  
363 Alignments were further processed with SAMtools [40], the Genome Analysis Toolkit (GATK)  
364 [41], and Picard. SNP and indel calling was performed using the Unified Genotyper Component  
365 of the GATK with the haploid setting. VCFtools [42] was utilized for processing of the resulting  
366 calls and variants were annotated using SnpEff [24]. Variant calls were visually examined using  
367 the Integrated Genome Viewer (IGV) [43]. FungiDB was also used to determine putative  
368 function and orthology of genes containing called variants in the dataset [44].

369

370 **Strain construction**

371 A *ugd1Δ* mutant was constructed in the KN99a background as follows. Primers pairs  
372 JOHE45233/JOHE45085, JOHE45086/JOHE45087, and JOHE45088/JOHE45234 were used to  
373 amplify 1 kb upstream of *UGD1*, the neomycin resistant marker, and 1 kb downstream of the  
374 *UGD1* gene, respectively. To generate the deletion allele for *C. neoformans* transformation, all  
375 three fragments were cloned into plasmid pRS426 by transforming *S. cerevisiae* strain FY834 as  
376 previously described [45]. Recombinant *S. cerevisiae* transformants were selected on SD-uracil  
377 media and verified by spanning PCR with primer pair JOHE45233/JOHE45234. The resulting  
378 PCR product was introduced into *C. neoformans* laboratory strain KN99a by biolistic  
379 transformation and transformants were selected on YPD containing neomycin. Putative *ugd1Δ*  
380 deletion mutants were confirmed by PCR.

381 *uxs1Δ* single mutants and *ugd1Δ uxs1Δ* double mutants were generated via a genetic  
382 cross. First, the KN99a *uxs1Δ* mutant from the Hiten Madhani deletion collection was mated  
383 with the wild-type KN99a laboratory strain. Through microdissection, spores were isolated,  
384 germinated, and genotyped via PCR for the gene deletion and the mating type locus to isolate a  
385 *MATa uxs1Δ* mutant in the KN99 background. Second, the KN99a *uxs1Δ* mutant was mated  
386 with wild-type H99. Spores were dissected and genotyped via PCR for the gene deletion and the  
387 mating type locus to isolate H99 *uxs1Δ* single mutants. Finally, the H99 *uxs1Δ* single mutant was  
388 crossed with KN99a *ugd1Δ* to generate *ugd1Δ uxs1Δ* double mutants, and the H99 *ugd1Δ* single  
389 mutant.

390

391

392

### 393 **Spot dilution assays**

394           Single colonies were inoculated into 5 mL of liquid YPD and grown overnight at 30°C.  
395 Cell density was determined using a hemocytometer and the cultures were diluted accordingly  
396 such that 100,000 cells were aliquoted on to the most concentrated spot and subsequent spots  
397 consisted of 10-fold dilutions per spot. Each strain was spotted onto YPD or YNB alone and onto  
398 media also containing 5FC or 5FU at the indicated concentration. Plates were incubated at 30°C  
399 until photographed.

400

### 401 **Swab assays**

402           Swab assays were conducted as previously described [12]. Briefly, independent colonies  
403 were inoculated in liquid YPD media and cultured with shaking until saturation. Sterile cotton  
404 swabs were then used to spread culture to a plate containing drug in order to select for resistant  
405 colonies. This assay is only semi-quantitative, as the inoculum is not strictly controlled between  
406 independent cultures when swabbing.

407

### 408 **Acknowledgements**

409           This study was supported by NIH/NIAID R37 MERIT award AI39115-21 and  
410 NIH/NIAID R01 AI50113-15 to J.H.; NIH/NIAID R21 AI109623 to T.L.D; and NIH/NIAID  
411 F30 AI120339 to L.X.L. This study utilized a *Cryptococcus* gene deletion collection deposited at  
412 the Fungal Genetics Stock Center and made freely available ahead of publication by the Madhani  
413 laboratory and funded by NIH R01 AI100272.

414

## 415 References

- 416 1. Brown GD, Denning DW, Gow NAR, Levitz SM, Netea MG, White TC. Hidden killers:  
417 human fungal infections. *Sci Transl Med*. 2012;4: 165rv13.
- 418 2. Rajasingham R, Smith RM, Park BJ, Jarvis JN, Govender NP, Chiller TM, et al. Global  
419 burden of disease of HIV-associated cryptococcal meningitis: an updated analysis. *Lancet*  
420 *Infect Dis*. 2017;17: 873–881.
- 421 3. Saag MS, Graybill RJ, Larsen RA, Pappas PG, Perfect JR, Powderly WG, et al. Practice  
422 guidelines for the management of Cryptococcal disease. *Clin Infect Dis*. 2000;30: 710–  
423 718.
- 424 4. Bennett JE, Dismukes WE, Duma RJ, Medoff G, Sande MA, Gallis H, et al. A  
425 comparison of amphotericin B alone and combined with flucytosine in the treatment of  
426 cryptococcal meningitis. *N Engl J Med*. 1979;301: 126–131.
- 427 5. Molloy SF, Kanyama C, Heyderman RS, Loyse A, Kouanfack C, Chanda D, et al.  
428 Antifungal combinations for treatment of Cryptococcal meningitis in Africa. *N Engl J*  
429 *Med*. 2018;378: 1004–1017.
- 430 6. Loyse A, Dromer F, Day J, Lortholary O, Harrison TS. Flucytosine and cryptococcosis:  
431 time to urgently address the worldwide accessibility of a 50-year-old antifungal. *J*  
432 *Antimicrob Chemother*. 2013;68: 2435–2444.
- 433 7. Hope W, Taberner L, Denning D, Anderson M. Molecular mechanisms of primary  
434 resistance to flucytosine in *Candida albicans*. *Antimicrob Agents Chemother*. 2004;48:  
435 4377–4386.
- 436 8. Papon N, Noël T, Florent M, Gibot-Leclerc S, Jean D, Chastin C, et al. Molecular  
437 mechanism of flucytosine resistance in *Candida lusitanae*: contribution of the *FCY2*,  
438 *FCY1*, and *FUR1* genes to 5-fluorouracil and fluconazole cross-resistance. *Antimicrob*  
439 *Agents Chemother*. 2007;51: 369–371.
- 440 9. McManus BA, Moran GP, Higgins JA, Sullivan DJ, Coleman DC. A Ser29Leu  
441 substitution in the cytosine deaminase Fca1p is responsible for clade-specific flucytosine  
442 resistance in *Candida dubliniensis*. *Antimicrob Agents Chemother*. 2009;53: 4678–4685.
- 443 10. Whelan WL. The genetic basis of resistance to 5-fluorocytosine in *Candida* species and  
444 *Cryptococcus neoformans*. *CRC Crit Rev Microbiol*. 1987;15: 45–56.
- 445 11. Vu K, Thompson George R III, Roe CC, Sykes JE, Dreibe EM, Lockhart SR, et al.  
446 Flucytosine resistance in *Cryptococcus gattii* is indirectly mediated by the *FCY2-FCY1-*  
447 *FUR1* pathway. *Med Mycol*. 2018;56: 857–867.
- 448 12. Billmyre RB, Clancey SA, Heitman J. Natural mismatch repair mutations mediate  
449 phenotypic diversity and drug resistance in *Cryptococcus deuterogattii*. *eLife*. 2017;6:  
450 e28802.
- 451 13. Boyce KJ, Wang Y, Verma S, Shakya VPS, Xue C, Idnurm A. Mismatch repair of DNA  
452 replication errors contributes to microevolution in the pathogenic fungus *Cryptococcus*  
453 *neoformans*. *mBio*. 2017;8.
- 454 14. Billmyre RB, Croll D, Li W, Mieczkowski P, Carter DA, Cuomo CA, et al. Highly  
455 recombinant VGII *Cryptococcus gattii* population develops clonal outbreak clusters  
456 through both sexual macroevolution and asexual microevolution. *mBio*. 2014;5: e01494-  
457 14.
- 458 15. Rhodes J, Beale MA, Vanhove M, Jarvis JN, Kannambath S, Simpson JA, et al. A  
459 population genomics approach to assessing the genetic basis of within-host



- 460 microevolution underlying recurrent cryptococcal meningitis infection. *G3*. 2017;7: 1165–  
461 1176.
- 462 16. Healey KR, Zhao Y, Perez WB, Lockhart SR, Sobel JD, Farmakiotis D, et al. Prevalent  
463 mutator genotype identified in fungal pathogen *Candida glabrata* promotes multi-drug  
464 resistance. *Nat Commun*. 2016;7: 11128.
- 465 17. Dellière S, Healey K, Gits-Muselli M, Carrara B, Barbaro A, Guigue N, et al. Fluconazole  
466 and echinocandin resistance of *Candida glabrata* correlates better with antifungal drug  
467 exposure rather than with *MSH2* mutator genotype in a French cohort of patients  
468 harboring low rates of resistance. *Front Microbiol*. 2016;7: 2038.
- 469 18. Healey KR, Jimenez Ortigosa C, Shor E, Perlin DS. Genetic drivers of multidrug  
470 resistance in *Candida glabrata*. *Front Microbiol*. 2016;7: 1995.
- 471 19. Hagen F, Khayhan K, Theelen B, Kolecka A, Polacheck I, Sionov E, et al. Recognition of  
472 seven species in the *Cryptococcus gattii/Cryptococcus neoformans* species complex.  
473 *Fungal Genet Biol*. 2015;78: 16–48.
- 474 20. Rhodes J, Desjardins CA, Sykes SM, Beale MA, Vanhove M, Sakthikumar S, et al.  
475 Tracing genetic exchange and biogeography of *Cryptococcus neoformans* var. *grubii* at  
476 the global population level. *Genetics*. 2017;207: 327–346.
- 477 21. Kwon-Chung KJ, Bennett JE, Wickes BL, Meyer W, Cuomo CA, Wollenburg KR, et al.  
478 The case for adopting the “Species Complex” nomenclature for the etiologic agents of  
479 Cryptococcosis. *mSphere*. 2017;2.
- 480 22. Gsaller F, Furukawa T, Carr PD, Rash B, Jöchl C, Bertuzzi M, et al. Mechanistic basis of  
481 pH-dependent 5-flucytosine resistance in *Aspergillus fumigatus*. *Antimicrob Agents*  
482 *Chemother*. 2018;62: e02593-17.
- 483 23. Yadav V, Sun S, Billmyre RB, Thimmappa BC, Shea T, Lintner R, et al. RNAi is a  
484 critical determinant of centromere evolution in closely related fungi. *Proc Natl Acad Sci*.  
485 2018;115: 3108–3113.
- 486 24. Cingolani P, Platts A, Wang LL, Coon M, Nguyen T, Wang L, et al. A program for  
487 annotating and predicting the effects of single nucleotide polymorphisms, SnpEff: SNPs in  
488 the genome of *Drosophila melanogaster* strain w1118; iso-2; iso-3. *Fly*. 2012;6: 80–92.
- 489 25. Bar-Peled M, Griffith CL, Doering TL. Functional cloning and characterization of a UDP-  
490 glucuronic acid decarboxylase: the pathogenic fungus *Cryptococcus neoformans*  
491 elucidates UDP-xylose synthesis. *Proc Natl Acad Sci*. 2001;98: 12003-12008.
- 492 26. Gish SR, Maier EJ, Haynes BC, Santiago-Tirado FH, Srikanta DL, Ma CZ, et al.  
493 Computational analysis reveals a key regulator of cryptococcal virulence and determinant  
494 of host response. *mBio*. 2016;7: e00313-16.
- 495 27. Li LX, Rautengarten C, Heazlewood JL, Doering TL. Xylose donor transport is critical for  
496 fungal virulence. *PLoS Pathog*. 2018;14: e1006765.
- 497 28. Klutts JS, Doering TL. Cryptococcal xylosyltransferase 1 (Cxt1p) from *Cryptococcus*  
498 *neoformans* plays a direct role in the synthesis of capsule polysaccharides. *J Biol Chem*.  
499 2008;283: 14327–14334.
- 500 29. Griffith CL, Klutts JS, Zhang L, Lavery SB, Doering TL. UDP-glucose dehydrogenase  
501 plays multiple roles in the biology of the pathogenic fungus *Cryptococcus neoformans*. *J*  
502 *Biol Chem*. 2004;279: 51669–51676.
- 503 30. Harris BE, Manning BW, Federle TW, Diasio RB. Conversion of 5-fluorocytosine to 5-  
504 fluorouracil by human intestinal microflora. *Antimicrob Agents Chemother*. 1986;29: 44-  
505 48.

- 506 31. Tenaillon O, Le Nagard H, Godelle B, Taddei F. Mutators and sex in bacteria: conflict  
507 between adaptive strategies. *Proc Natl Acad Sci U S A*. 2000;97: 10465–70.
- 508 32. Moyrand F, Klaproth B, Himmelreich U, Dromer F, Janbon G. Isolation and  
509 characterization of capsule structure mutant strains of *Cryptococcus neoformans*. *Mol*  
510 *Microbiol*. 2002;45: 837–849.
- 511 33. Chapeland-Leclerc F, Bouchoux J, Goumar A, Chastin C, Villard J, Noel T. Inactivation  
512 of the *FCY2* gene encoding purine-cytosine permease promotes cross-resistance to  
513 flucytosine and fluconazole in *Candida lusitaniae*. *Antimicrob Agents Chemother*.  
514 2005;49: 3101–3108.
- 515 34. Florent M, Noel T, Ruprich-Robert G, Da Silva B, Fitton-Ouhabi V, Chastin C, et al.  
516 Nonsense and missense mutations in *FCY2* and *FCY1* genes are responsible for  
517 flucytosine resistance and flucytosine-fluconazole cross-resistance in clinical isolates of  
518 *Candida lusitaniae*. *Antimicrob Agents Chemother*. 2009;53: 2982–2990.
- 519 35. Moertel CG. Chemotherapy for colorectal cancer. *N Engl J Med*. 1994;330: 1136–1142.
- 520 36. Pullarkat ST, Stoehlmacher J, Ghaderi V, Xiong Y-P, Ingles SA, Sherrod A, et al.  
521 Thymidylate synthase gene polymorphism determines response and toxicity of 5-FU  
522 chemotherapy. *Pharmacogenomics J*. 2001;1: 65.
- 523 37. Pitkin JW, Panaccione DG, Walton JD. A putative cyclic peptide efflux pump encoded by  
524 the *TOXA* gene of the plant-pathogenic fungus *Cochliobolus carbonum*. *Microbiology*.  
525 1996;142: 1557–1565.
- 526 38. Farrer RA, Desjardins CA, Sakthikumar S, Gujja S, Saif S, Zeng Q, et al. Genome  
527 evolution and innovation across the four major lineages of *Cryptococcus gattii*. *mBio*.  
528 2015;6: e00868-15.
- 529 39. Li H, Durbin R. Fast and accurate short read alignment with Burrows-Wheeler transform.  
530 *Bioinformatics*. 2009;25: 1754–60.
- 531 40. Li H, Handsaker B, Wysoker A, Fennell T, Ruan J, Homer N, et al. The Sequence  
532 Alignment/Map format and SAMtools. *Bioinformatics*. 2009;25: 2078–9.
- 533 41. McKenna A, Hanna M, Banks E, Sivachenko A, Cibulskis K, Kernytsky A, et al. The  
534 Genome Analysis Toolkit: A MapReduce framework for analyzing next-generation DNA  
535 sequencing data. *Genome Res*. 2010;20: 1297–303.
- 536 42. Danecek P, Auton A, Abecasis G, Albers CA, Banks E, DePristo MA, et al. The variant  
537 call format and VCFtools. *Bioinformatics*. 2011;27: 2156–8.
- 538 43. Thorvaldsdóttir H, Robinson JT, Mesirov JP. Integrative Genomics Viewer (IGV): high-  
539 performance genomics data visualization and exploration. *Brief Bioinform*. 2013;14: 178–  
540 92.
- 541 44. Stajich JE, Harris T, Brunk BP, Brestelli J, Fischer S, Harb OS, et al. FungiDB: an  
542 integrated functional genomics database for fungi. *Nucleic Acids Res*. 2012;40: D675-81.
- 543 45. Ianiri G, Averette AF, Kingsbury JM, Heitman J, Idnurm A. Gene function analysis in the  
544 ubiquitous human commensal and pathogen *Malassezia* genus. *mBio*. 2016;7.  
545  
546

547 **Figure legends**

548

549 **Figure 1. 5FC resistance is enhanced by defects in mismatch repair.** A) Swab assays were  
550 conducted using both the wildtype R265 strain and two independent *msh2Δ::NEO* mutants to test  
551 for the ability to generate resistance to 5FC. All three strains developed resistance; however, the  
552 mismatch repair mutants generated resistant isolates at a higher frequency. B) A fluctuation  
553 assay was conducted to compare 5FC resistance quantitatively between wildtype R265 and two  
554 independent *msh2Δ::NEO* mutants. Mutation rate was normalized to the wildtype strain. Both  
555 mutator strains showed a greater than 15-fold increase in the rate of resistance.

556

557 **Figure 2. Exposure to 5FC generates an adaptive advantage for mutator strains.**

558 Competition experiments between a tester strain with a neomycin resistance marker and a  
559 wildtype R265 strain. (Strain used: SEC501, RBB17, RBB18). Overnight cultures were mixed  
560 1:1 and then used to inoculate a second overnight culture in liquid YNB with and without 5FC.  
561 All three marked strains showed a slight growth defect in comparison to the unmarked strain in  
562 nonselective media but only the hypermutator strains demonstrated a dramatic growth advantage  
563 when grown in YNB+5FC. Boxplots show minimum, first quartile, median, third quartile, and  
564 maximum values. Points represent the results from three individual replicates and are  
565 summarized by the box plot. The R265 *NEO<sup>R</sup>* vs wildtype competition is gray, while the  
566 two *msh2Δ::NEO* vs wildtype competitions are dark and light blue.

567

568 **Figure 3. 5FC resistant mutants are cross-resistant to 5FU.**

569 A) Isolates that were selected based on growth on 5FC media were patched to YNB, YNB with  
570 5FC, and YNB with 5FU. Each plate has parental and *fur1* mutant controls in the top row.  
571 Hypermutator controls have occasional resistant colonies that emerged in the growth patch.  
572 Sanger sequencing revealed that very few isolates had sustained mutations in *FUR1*. B)  
573 Schematic showing the predicted domains encoded by the *UXS1* gene as well as the location and  
574 number of mutations identified. Nonsense alleles are shown in red and missense are shown in  
575 blue.

576

577 **Figure 4. *uxs1* mutants mediate 5FC resistance through a xylosylation-independent**  
578 **mechanism.**

579 A) KN99 deletion strains from the *C. neoformans* deletion collection show that deletion of *UXS1*  
580 confers resistance to 5FC and 5FU. The RBB18-2 strain carrying an *fcy2* and *uxs1* mutation is  
581 resistant to 5FC and 5FU although more weakly to 5FU. The R265-3 strain carrying a *fur1*  
582 mutation is completely resistant to both drugs. B) Spot dilution assay on YNB, YNB plus 5FC,  
583 and YNB plus 5FU demonstrating overexpression of *UXS1* driven by the actin promoter does not  
584 confer increased sensitivity to 5FC or 5FU. C) Spot dilution assays on YNB, YNB plus 5FC, and  
585 YNB plus 5FU demonstrating that mutants deficient in UDP-xylose transport (*uxt1Δ*, *uxt2Δ*,  
586 *uxt1Δ uxt2Δ*) and xylose transferase mutants (*cxt1Δ*, *cxt2Δ*, *cxt1Δ cxt2Δ*) show no change in 5FC  
587 and 5FU sensitivity. D) Spot dilution assay on YPD, YPD plus 5FC, and YPD plus 5FU showing  
588 that *ugd1* mutants are viable on rich YPD media but retain sensitivity to 5FC and 5FU. In  
589 addition, *ugd1 uxs1* double mutants retain sensitivity to 5FC and 5FU like a *ugd1* single mutant  
590 rather than gain resistance like the *uxs1* single mutant.

591 **Figure 5. Model of inhibition of 5FC/5FU toxicity by *uxs1* mutation.**

592 Potential mechanisms by which *uxs1* mutations may confer resistance to both 5FC and 5FU.

593 Mutation of *uxs1* causes an accumulation of UDP-glucuronic acid, the product of *Ugd1*, which  
594 either impairs production of toxic fluoridated molecules or rescues inhibition of the targets of  
595 those fluoridated molecules, such as thymidylate synthase. Protein names are in red for those  
596 where mutations were found in this study.

597

598 **Supplementary Figure 1. VGIIa-like isolates acquire resistance to 5FC and 5FU more**  
599 **rapidly than the VGIIa isolate R265.**

600 VGIIa-like strains NIH444 and CBS7750 that harbor *msh2* nonsense alleles were tested for the  
601 ability to generate resistance to 5FC and 5FU in comparison with the closely related VGIIa strain  
602 R265. For each strain, 5 mL YPD cultures were inoculated from a single colony and grown  
603 overnight at 30°C. After washing, 100 µl of a 10<sup>-5</sup> dilution was plated to YNB control plates and  
604 100 µl of undiluted cultures was plated on media containing 5FC and 5FU. The VGIIa-like  
605 strains generated substantially more isolates resistant to both drugs.

606

607 **Supplementary Figure 2. Frozen stocks of strains with mixed allele frequencies did not**  
608 **contain a mix of 5FC resistant and susceptible strains.**

609 Individual colonies subcultured from frozen stocks of 5FC-resistant strains were tested for  
610 growth on YNB, YNB+5FU and YNB+5FC. Ten colonies were isolated from each strain. Each  
611 plate contains a parental strain that has not previously been exposed to drug and a *fur1* mutant as  
612 controls. All colonies appeared resistant to both 5FC and 5FU, suggesting frozen stocks did not

613 contain mixed cultures. Hypermutator parental strains sometimes generated partially resistant  
614 patches.

615

616 **Supplementary Figure 3. Mutants of *fcy1* and *fur1* in *Cryptococcus neoformans* are**  
617 **resistant to 5FC but not 5FU.**

618 *fur1* $\Delta$  and *fcy1* $\Delta$  strains from the KN99 *C. neoformans* collection were struck onto YNB, YNB +  
619 100  $\mu$ g/mL 5FC, and YNB + 100  $\mu$ g/mL 5FU. While the *fcy1* $\Delta$  mutant strain grew on media  
620 containing 5FC, it did not grow on media containing 5FU. In contrast, the *fur1* $\Delta$  mutant strain  
621 grew on media with either drug.

622

623 **Table 1. 5FC-resistant isolates whole genome sequenced or successfully genotyped by**  
 624 **Sanger sequencing.**

| Strain Name | Original Genotype | Putative Resistance Allele                                                    |
|-------------|-------------------|-------------------------------------------------------------------------------|
| R265-1      | Wildtype          | <i>fur1</i> 455delT                                                           |
| R265-2      | Wildtype          | ~18.5 kb Deletion spanning <i>fur1</i>                                        |
| R265-3      | Wildtype          | <i>fur1</i> 1003delT, mutation detected via Sanger                            |
| R265-4      | Wildtype          | <i>fur1</i> 1136delT, mutation detected via Sanger                            |
| R265-5      | Wildtype          | <i>uxs1</i> 828delT                                                           |
| R265-6      | Wildtype          | <i>fur1</i> 1440delA, mutation detected via Sanger                            |
| RBB17-1     | <i>msh2Δ::NEO</i> |                                                                               |
| RBB17-2     | <i>msh2Δ::NEO</i> |                                                                               |
| RBB17-3     | <i>msh2Δ::NEO</i> |                                                                               |
| RBB17-4     | <i>msh2Δ::NEO</i> |                                                                               |
| RBB17-5     | <i>msh2Δ::NEO</i> | <i>fur1</i> Gly190Asp (mixed allele)                                          |
| RBB17-6     | <i>msh2Δ::NEO</i> |                                                                               |
| RBB17-7     | <i>msh2Δ::NEO</i> |                                                                               |
| RBB17-8     | <i>msh2Δ::NEO</i> | <i>fur1</i> Gly190Asp (mixed allele)                                          |
| RBB18-1     | <i>msh2Δ::NEO</i> |                                                                               |
| RBB18-2     | <i>msh2Δ::NEO</i> | <i>fcy2</i> Trp167Stop (mixed allele)<br><i>uxs1</i> Asp306Gly (mixed allele) |
| RBB18-3     | <i>msh2Δ::NEO</i> |                                                                               |
| RBB18-4     | <i>msh2Δ::NEO</i> | <i>fcy2</i> Trp167Stop<br><i>uxs1</i> Asp306Gly (mixed allele)                |
| RBB18-5     | <i>msh2Δ::NEO</i> | <i>fcy2</i> Trp167Stop (mixed allele)<br><i>uxs1</i> Asp306Gly (mixed allele) |
| RBB18-6     | <i>msh2Δ::NEO</i> | <i>uxs1</i> Tyr217Cys (mixed allele)                                          |
| RBB18-7     | <i>msh2Δ::NEO</i> |                                                                               |
| RBB18-8     | <i>msh2Δ::NEO</i> | <i>uxs1</i> 494insC in 7 base homopolymer                                     |
| RBB18-9     | <i>msh2Δ::NEO</i> | <i>uxs1</i> Tyr217Cys (mixed allele)                                          |

625

626

627 **Table S1.** Strains and plasmids used in this study

| Strain name | Genotype                                                                                      | Construction or source                                    |
|-------------|-----------------------------------------------------------------------------------------------|-----------------------------------------------------------|
| RBB17       | R265 <i>MAT<math>\alpha</math> msh2<math>\Delta</math>::NEO</i>                               | Billmyre et al, 2017 [12]                                 |
| RBB18       | R265 <i>MAT<math>\alpha</math> msh2<math>\Delta</math>::NEO</i>                               | Billmyre et al, 2017 [12]                                 |
| SEC612      | KN99 <i>MAT<math>\alpha</math> ugd1<math>\Delta</math>::NEO</i>                               | Biolistic transformation                                  |
| SEC613      | H99 <i>MAT<math>\alpha</math> ugd1<math>\Delta</math>::NEO</i>                                | SEC612 x SEC615                                           |
| SEC614      | KN99 <i>MAT<math>\alpha</math> uxs1<math>\Delta</math>::NAT</i>                               | KN99a x KN99 $\alpha$ <i>uxs1<math>\Delta</math>::NAT</i> |
| SEC615      | H99/KN99 <i>MAT<math>\alpha</math> uxs1<math>\Delta</math>::NAT</i>                           | H99 x SEC614                                              |
| SEC616      | KN99 <i>MAT<math>\alpha</math> ugd1<math>\Delta</math>::NEO uxs1<math>\Delta</math>::NAT</i>  | SEC612 x SEC615                                           |
| SEC617      | H99 <i>MAT<math>\alpha</math> ugd1<math>\Delta</math>::NEO uxs1<math>\Delta</math>::NAT-1</i> | SEC612 x SEC615                                           |
| SEC618      | H99 <i>MAT<math>\alpha</math> ugd1<math>\Delta</math>::NEO uxs1<math>\Delta</math>::NAT-2</i> | SEC612 x SEC615                                           |
| TDY1787     | KN99 <i>MAT<math>\alpha</math> uxs1<math>\Delta</math>::NAT</i>                               | Li et al, 2018 [27]                                       |
| TDY1811     | KN99 <i>MAT<math>\alpha</math> uxs1<math>\Delta</math>::NAT UXS1::NEO</i>                     | Li et al, 2018 [27]                                       |
| TDY1799     | KN99 <i>MAT<math>\alpha</math> P<sub>ACT1</sub> UXS1 overexpression (NAT)</i>                 | Gish et al, 2016 [26]                                     |
| TDY1679     | KN99 <i>MAT<math>\alpha</math> uxt1<math>\Delta</math>::NEO</i>                               | Li et al, 2018 [27]                                       |
| TDY1685     | KN99 <i>MAT<math>\alpha</math> uxt2<math>\Delta</math>::NAT</i>                               | Li et al, 2018 [27]                                       |
| TDY1695     | KN99 <i>MAT<math>\alpha</math> uxt1<math>\Delta</math>::NEO uxt2<math>\Delta</math>::NAT</i>  | Li et al, 2018 [27]                                       |
| TDY1076     | KN99 <i>MAT<math>\alpha</math> cxt1<math>\Delta</math>::NAT</i>                               | Klutts et al, 2008 [28]                                   |
| TDY1077     | KN99 <i>MAT<math>\alpha</math> cxt2<math>\Delta</math>::NEO</i>                               | Klutts et al, in preparation                              |
| TDY1078     | KN99 <i>MAT<math>\alpha</math> cxt1<math>\Delta</math>::NAT cxt2<math>\Delta</math>::NEO</i>  | Klutts et al, in preparation                              |
|             | KN99 <i>MAT<math>\alpha</math> fur1<math>\Delta</math>::NAT</i>                               | Madhani collection                                        |
|             | KN99 <i>MAT<math>\alpha</math> uxs1<math>\Delta</math>::NAT</i>                               | Madhani collection                                        |
|             | KN99 <i>MAT<math>\alpha</math> fcy1<math>\Delta</math>::NAT</i>                               | Madhani collection                                        |
|             | KN99 <i>MAT<math>\alpha</math> fcy2<math>\Delta</math>::NAT</i>                               | Madhani collection                                        |

628



629 **Table S2.** Oligonucleotides used in this study

| Primer    | Sequence                                               | Description                                                                                                                                     |
|-----------|--------------------------------------------------------|-------------------------------------------------------------------------------------------------------------------------------------------------|
| JOHE45233 | gtaacgccagggttttcccagtcacgacgCCTAAA<br>TGTGTTTGCTATGTG | 5' primer to amplify 1 kb upstream <i>UGDI</i> for homologous recombination gene deletion. Includes homology to pGI3.                           |
| JOHE45085 | ctggccgtcgttttaTTTGAATGGGGTTG<br>AGGGTA                | 3' primer to amplify 1 kb upstream <i>UGDI</i> for homologous recombination gene deletion. Includes homology to <i>NEO</i> .                    |
| JOHE45086 | TACCCTCAACCCCATTCAAAataaaa<br>cgacggccag               | 5' primer to amplify <i>NEO</i> for homologous recombination gene deletion of <i>UGDI</i> . Includes homology to <i>UGDI</i> upstream region.   |
| JOHE45087 | GTCGCCGGTACCGATAGTcaggaaa<br>cagctatgac                | 3' primer to amplify <i>NEO</i> for homologous recombination gene deletion of <i>UGDI</i> . Includes homology to <i>UGDI</i> downstream region. |
| JOHE45088 | gtcatagctgtttctgACTATCGGTACC<br>GGCGAC                 | 5' primer to amplify 1 kb downstream <i>UGDI</i> for homologous recombination gene deletion. Includes homology to <i>NEO</i> .                  |
| JOHE45234 | gcgataacaatttcacacaggaaacagcCTC<br>ACGATTGCCTCATAAAC   | 3' primer to amplify 1 kb downstream <i>UGDI</i> for homologous recombination gene deletion. Includes homology to pGI3.                         |
| JOHE45303 | GCGTTGAAGTGGTAAGTG                                     | Internal 5' <i>UGDI</i> screening primer                                                                                                        |
| JOHE45304 | GACGATCTTGGAAGAGGTAG                                   | Internal 3' <i>UGDI</i> screening primer                                                                                                        |
| JOHE45335 | GTCCTCGACAACTTCTTCAC                                   | Internal 5' <i>UXS1</i> screening primer                                                                                                        |
| JOHE45336 | CGGTGATAACCATAGGTC                                     | Internal 3' <i>UXS1</i> screening primer                                                                                                        |
| JOHE41579 | CTAACTCTACTACACCTCACGGCA                               | 5' <i>STE20a</i> screening primer                                                                                                               |
| JOHE41580 | CGCACTGCAAAATAGATAAGTCTG                               | 3' <i>STE20a</i> screening primer                                                                                                               |
| JOHE41581 | GGCTGCAATCACAGCACCTTAC                                 | 5' <i>STE20α</i> screening primer                                                                                                               |
| JOHE41582 | CTTCATGACATCACTCCCCTAT                                 | 3' <i>STE20α</i> screening primer                                                                                                               |

630

Figure 1

bioRxiv preprint doi: <https://doi.org/10.1101/636928>; this version posted May 13, 2019. The copyright holder for this preprint (which was not certified by peer review) is the author/funder, who has granted bioRxiv a license to display the preprint in perpetuity. It is made available under aCC-BY-NC-ND 4.0 International license.

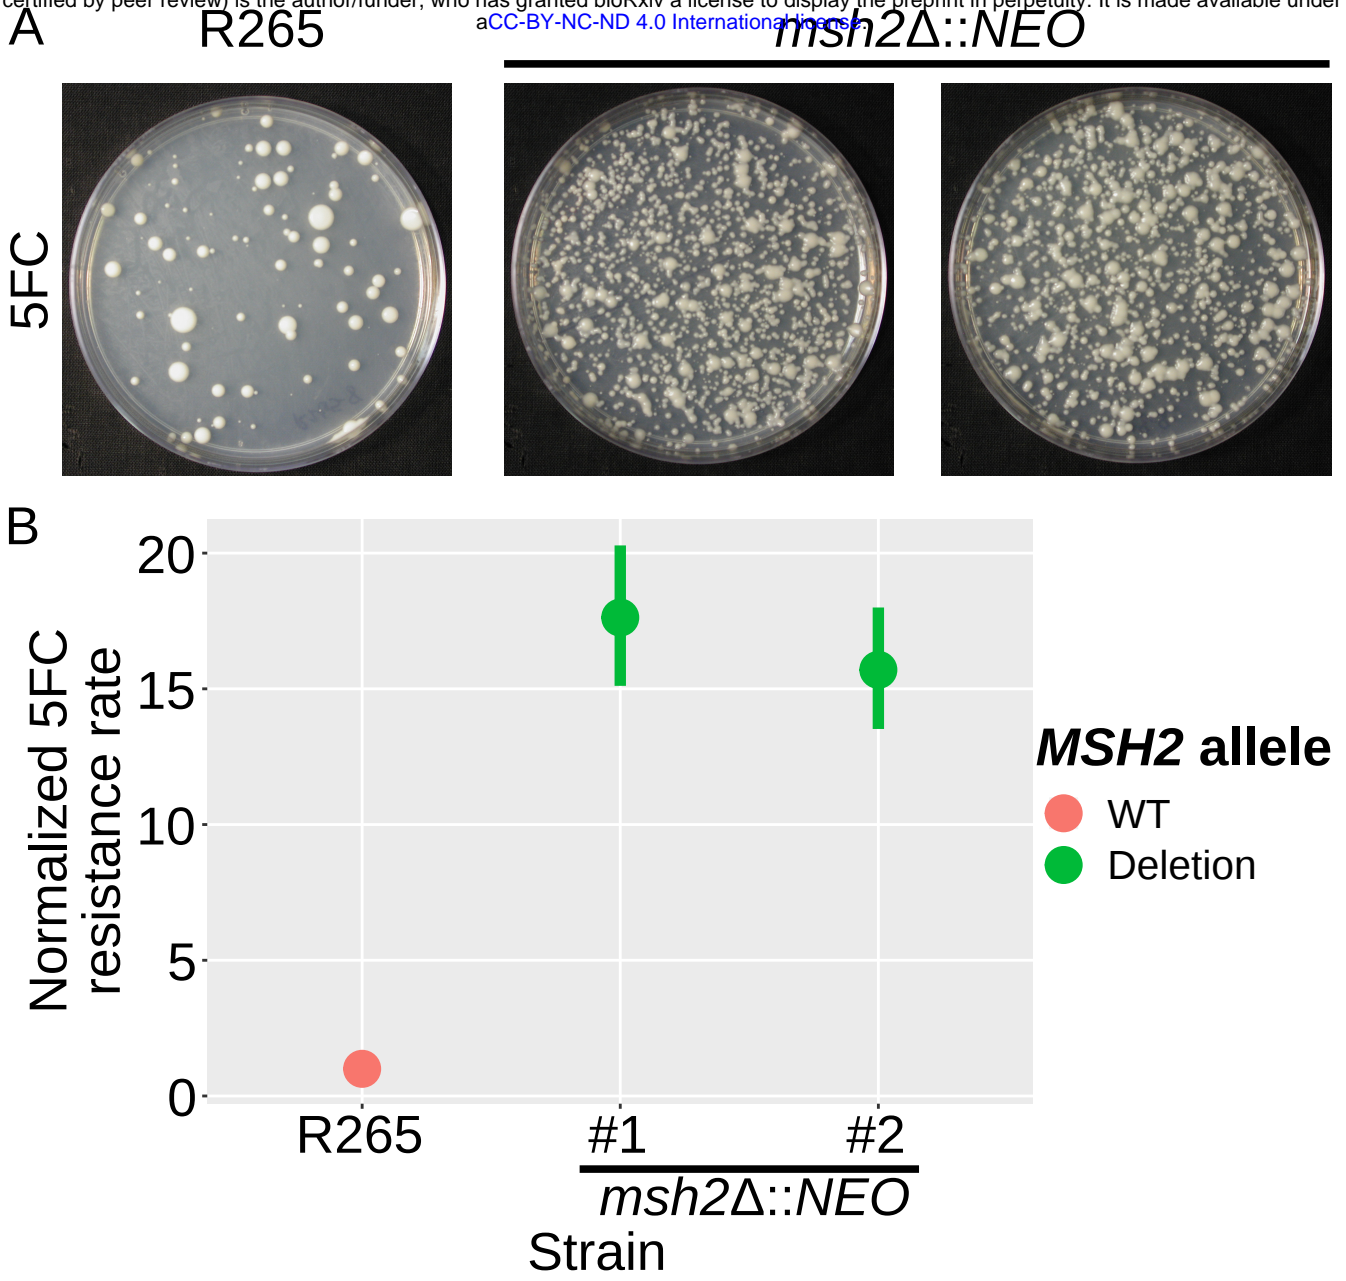

Figure 2

bioRxiv preprint doi: <https://doi.org/10.1101/636928>; this version posted May 13, 2019. The copyright holder for this preprint (which was not certified by peer review) is the author/funder, who has granted bioRxiv a license to display the preprint in perpetuity. It is made available under aCC-BY-NC-ND 4.0 International license.

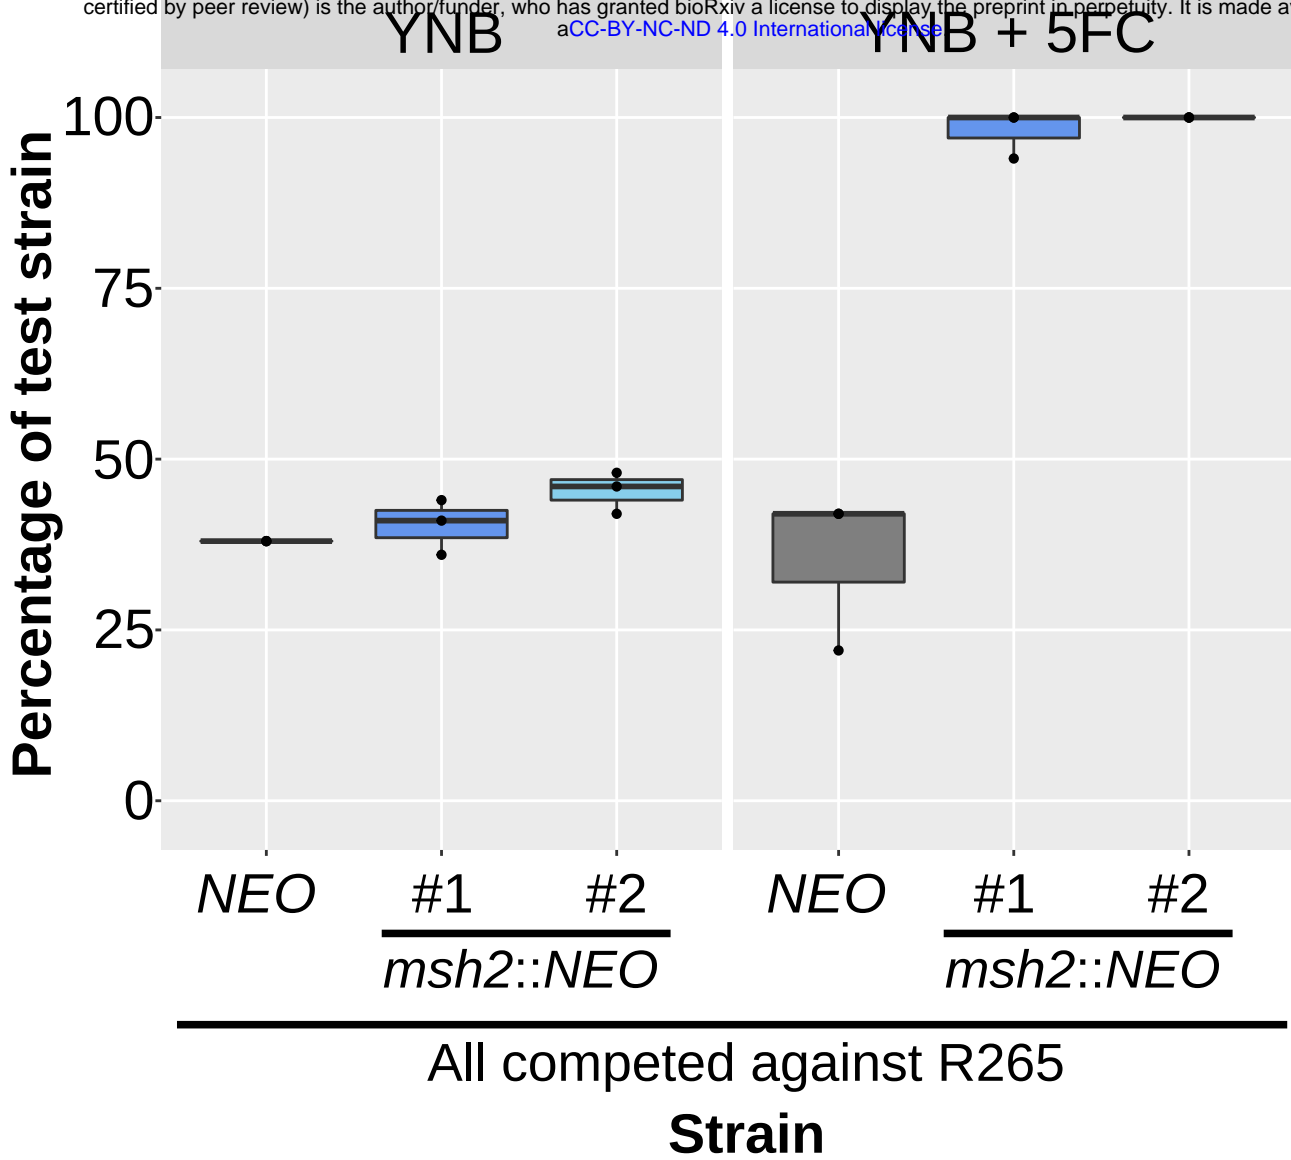

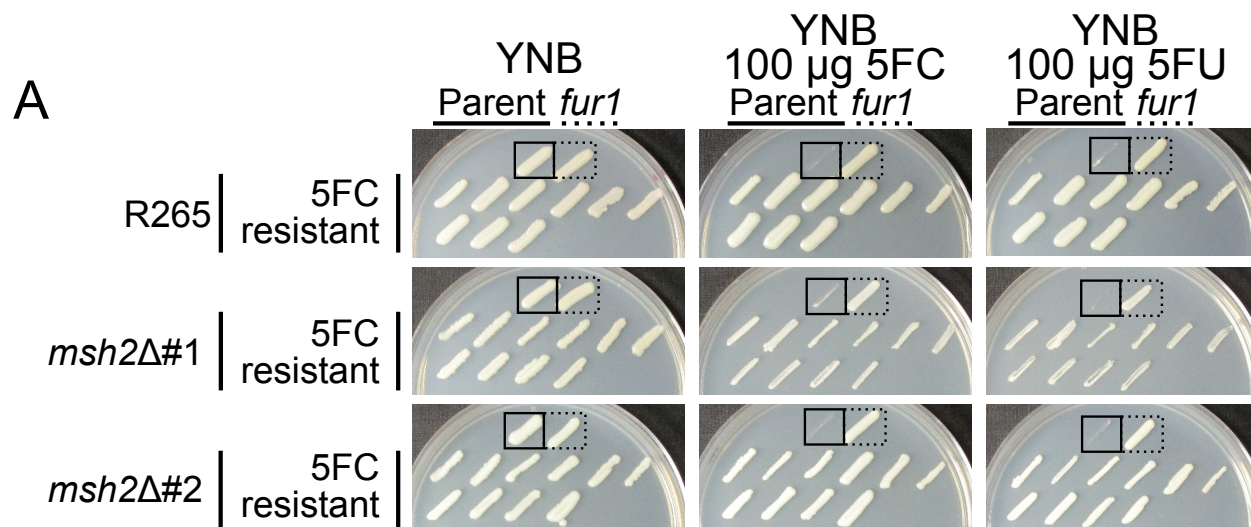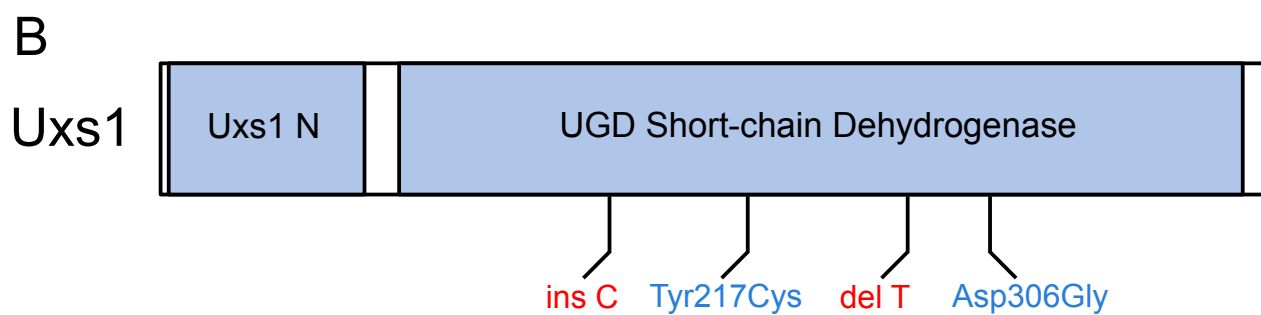



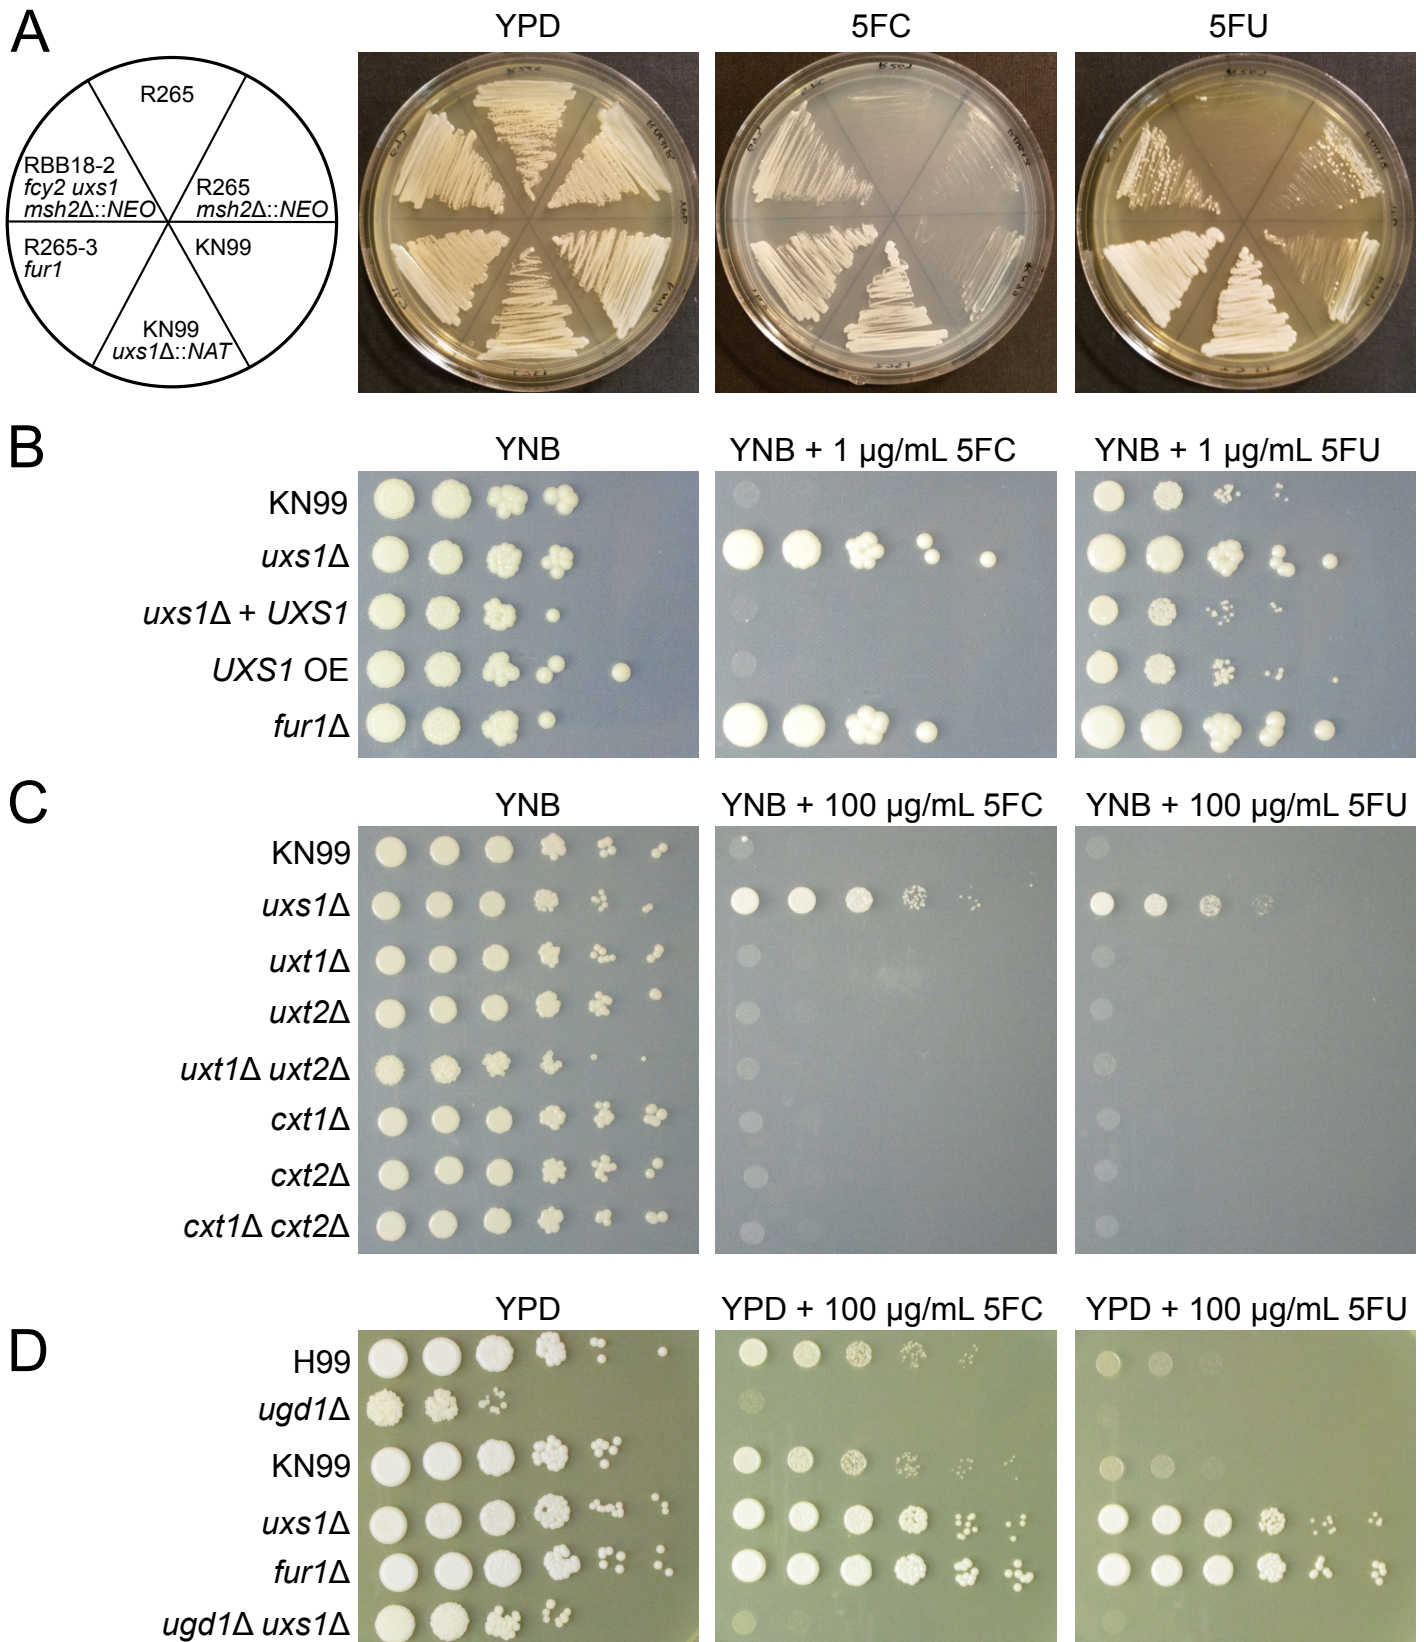

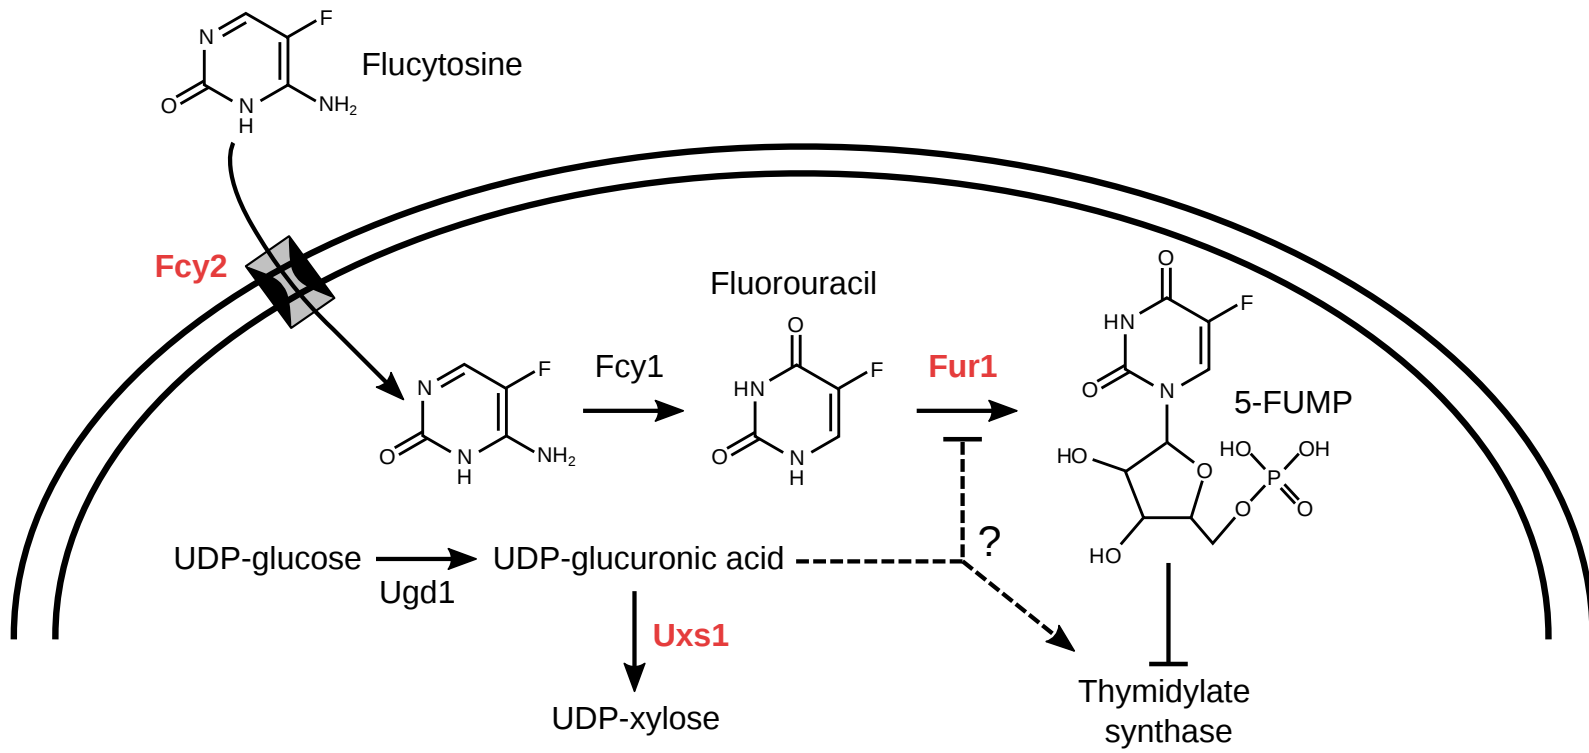

Source: http://biorxiv.org/content/10.1101/636928v1.full.pdf
