1  
2 **Hypermethylation in *Cryptococcus* reveals a**  
3 **novel pathway to 5-fluorocytosine (5FC) resistance**

4  
5 R. Blake Billmyre<sup>1†§</sup>, Shelly Applen Clancey<sup>1§</sup>, Lucy X. Li<sup>2</sup>, Tamara L. Doering<sup>2</sup>, and  
6 Joseph Heitman<sup>1\*</sup>  
7

8  
9 <sup>1</sup>Department of Molecular Genetics and Microbiology, Duke University Medical Center,  
10 Durham, NC, USA

11 <sup>2</sup>Department of Molecular Microbiology, Washington University School of Medicine, Saint  
12 Louis, Missouri 63110  
13

14  
15  
16  
17  
18  
19  
20  
21  
22  
23  
24  
25  
26  
27  
28  
29 § These authors contributed equally to this work.

30  
31 † Present address:

32 Stowers Institute for Medical Research

33 1000 E 50<sup>th</sup> St.

34 Kansas City, MO 64110, USA  
35

36 \*Corresponding author:

37 Room 322 CARL Building

38 Box 3546 Research Drive

39 Department of Molecular Genetics and Microbiology

40 Duke University Medical Center, Durham, NC 27710, USA

41 Email: [heitm001@duke.edu](mailto:heitm001@duke.edu)

42 Phone: (919) 684-2824

43 Fax: (919) 684-5458  
44

## 45 **Abstract**

46 Drug resistance is a critical challenge in treating infectious disease. For fungal infections, this  
47 issue is exacerbated by the limited number of available and effective antifungal agents. Patients  
48 infected with the fungal pathogen *Cryptococcus* are most effectively treated with a combination  
49 of amphotericin B and 5-fluorocytosine (5FC). Isolates causing infections frequently develop  
50 resistance to 5FC although the mechanism of this resistance is poorly understood. Here we show  
51 that resistance is acquired more frequently in isolates with defects in DNA mismatch repair that  
52 confer an elevated mutation rate. Natural isolates of *Cryptococcus* with mismatch repair defects  
53 have recently been described and defective mismatch repair has been reported in other  
54 pathogenic fungi. In addition, whole genome sequencing was utilized to identify mutations  
55 associated with 5FC resistance *in vitro*. Using a combination of candidate-based Sanger and  
56 whole genome Illumina sequencing, the presumptive genetic basis of resistance in 16  
57 independent isolates was identified, including mutations in the known resistance genes *FURI*  
58 and *FCY2*, as well as a novel gene, *UXSI*. Mutations in *UXSI* lead to accumulation of a  
59 metabolic intermediate that appears to suppress toxicity of both 5FC and its toxic derivative  
60 5FU. Interestingly, while a *UXSI* ortholog has not been identified in other fungi like  
61 *Saccharomyces cerevisiae*, where the mechanisms underlying 5FC and 5FU resistance were  
62 elucidated, a *UXSI* ortholog is found in humans, suggesting that mutations in *UXSI* in cancer  
63 cells may also play a role in resistance to 5FU when used during cancer chemotherapy in  
64 humans.

65

## 66 **Introduction**

67           One of the key challenges of the 21<sup>st</sup> century is the emergence and reemergence of  
68 pathogens. Opportunistic fungal pathogens comprise an important component of this problem as  
69 they infect the rapidly expanding cohort of immunocompromised patients [1]. These pathogens  
70 are responsible for millions of infections annually, with substantial mortality. Among the most  
71 dangerous are *Cryptococcus* species that cause approximately 220,000 infections a year, with  
72 more than 181,000 attributable deaths [2]. Cryptococcosis is particularly prominent in Sub-  
73 Saharan Africa, where the HIV/AIDS epidemic has resulted in a large population of susceptible  
74 individuals. Cryptococcosis is treated most effectively using a combination of 5-fluorocytosine  
75 (5FC) and amphotericin B [3,4]. However, in the parts of Africa where patients are most  
76 commonly afflicted with cryptococcosis, the medical infrastructure is insufficient to allow  
77 treatment with the highly toxic amphotericin B component of this dual therapy. Instead patients  
78 are typically treated with fluconazole monotherapy, with limited success. Excitingly, recent  
79 studies have shown that 5FC can be effectively paired with fluconazole to replace amphotericin  
80 B for treatment of patients in Africa [5]. However, 5FC is not yet approved or available for  
81 treatment in any African countries.

82           5FC acts as a prodrug, which enters cells via the cytosine permease Fcy2. 5FC itself is  
83 not toxic, but upon uptake into fungal cells, it is converted into toxic 5-fluorouracil (5FU) by  
84 cytosine deaminase, an enzyme that is not present in human cells [6]. In *Cryptococcus*, and other  
85 fungi, cytosine deaminase is encoded by the *FCY1* gene. 5FU is then further processed by the  
86 product of the *FUR1* gene, a uracil phosphoribosyltransferase, and inhibits both DNA and  
87 protein synthesis. Resistance is well understood in other fungal pathogens, like *Candida*  
88 *albicans*, where loss of function mutations in *FCY1*, *FCY2*, and *FUR1* can mediate resistance to

89 5FC [7]. In *Candida lusitanae*, mutations in *FUR1* can be readily distinguished from mutations  
90 in *FCY1* and *FCY2* because only *fur1* mutations result in cross-resistance to 5FU [8]. Likewise,  
91 in *Candida dubliniensis*, natural missense *fur1* mutations affect both 5FC and 5FU resistance [9].  
92 However, little work has been conducted on 5FC resistance directly in *Cryptococcus*. One of the  
93 few early studies suggested that reductions in *FUR1* activity may be linked to resistance to 5FC  
94 based on a high frequency of cross-resistance to 5FU [10]. However, this study took place prior  
95 to the cloning or sequencing of the *FUR1* gene in *Cryptococcus* and attribution of resistance to  
96 *FUR1* was based only on cross-resistance to 5FU. More recent studies of 5FC resistant  
97 *Cryptococcus bacillisporus* isolates found no mutations in *FCY1*, *FUR1*, or any of three putative  
98 *FCY2* paralogs that explained drug resistance [11]. However, in *Cryptococcus deuterogattii*,  
99 deletions of *FCY2* confer resistance to 5FC [12].

100       Recent work has demonstrated one source of increased rates of resistance to antifungal  
101 drugs in *Cryptococcus*: defects in the DNA mismatch repair pathway [13,14]. Natural isolates  
102 with DNA mismatch repair defects have been identified in both an outbreak population of  
103 *Cryptococcus deuterogattii* [13,15] and in *Cryptococcus neoformans* [14,16]. Defects in  
104 mismatch repair are also common in other human fungal pathogens, including *Candida glabrata*  
105 [17]. Depending on the population studied, multidrug resistance is sometimes linked to the  
106 hypermutator state in *C. glabrata* [18,19]. A recent study of clinical *C. glabrata* isolates in India  
107 found a high prevalence of *msh2* mutation, but no drug resistance [20]. This could suggest that  
108 hypermutation is advantageous even prior to drug exposure, while also providing more rapid  
109 development of resistance when antifungal drugs or agents are encountered. Alternatively,  
110 hypermutation has also been observed in more ancient lineages of fungi not known to be  
111 pathogenic, suggesting that hypermutation may have general advantages in a broader range of



112 settings [21]. Here we demonstrate that DNA mismatch repair defects also enable rapid  
113 resistance to 5FC in *C. deuterogattii* (previously known as *C. gattii* VGII [22–24]). We then  
114 utilize whole genome Illumina sequencing, in combination with candidate-based Sanger  
115 sequencing, to identify the genetic basis for drug resistance in 16 independent isolates. We  
116 attribute resistance to mutations in *FURI* and unexpectedly, we also identify a novel pathway of  
117 resistance to 5FC involving mutations in the pathway responsible for producing the capsule, a  
118 core component of cryptococcal virulence.  
119

## 120 **Results**

121 In a previous study, we demonstrated that mismatch repair mutations conferred increased  
122 rates of resistance to the antifungal drugs FK506 and rapamycin [13]. Because these  
123 hypermutator strains are found among both environmental and clinical isolates, here we tested if  
124 a hypermutator state could also confer resistance to one of the front-line drugs used to treat  
125 Cryptococcosis: 5-fluorocytosine (5FC). A semi-quantitative swabbing assay was first employed  
126 to demonstrate that deletions of the mismatch repair gene *MSH2* in *Cryptococcus deuterogattii*  
127 confer an elevated rate of resistance to 5FC (Figure 1A). This result was confirmed using a  
128 quantitative fluctuation assay approach (Figure 1B). This assay revealed a greater than 15-fold  
129 increase in the generation of resistance to 5FC in *msh2* $\Delta$  mismatch repair defective mutants.  
130 Similarly, a simple spreading assay using VGIIa-like strains that had previously been found to  
131 harbor an *msh2* nonsense allele [13] demonstrated a much higher rate of resistance to both 5FC  
132 and 5FU than in the VGIIa non-hypermutator strains (Supplemental Figure 1).

133 In previous studies, mutator alleles in *C. deuterogattii* were not found to be generally  
134 advantageous in rich media [13]. However, under stressful conditions, such as drug challenge  
135 with FK506 and rapamycin, mutator alleles were highly beneficial. A competitive growth  
136 experiment was utilized to test the same concept with 5FC. Mutator strains became resistant to  
137 5FC at a higher rate and thus rapidly outcompeted wildtype strains (Figure 2). However, in the  
138 absence of added stress, the mutator alleles showed no such advantage. This result suggests that  
139 drug challenge during infection may select for strains with elevated mutation rates that are able  
140 to acquire drug resistance more rapidly.

141 In other fungi, resistance to 5FC is typically mediated by mutations in one of three genes:  
142 *FCY1*, *FCY2*, or *FURI* [7,8,10,25]. As described above, mutations in *FCY1* and *FCY2* are

143 typically distinguishable from *fur1* mutations because mutations in *FURI* confer resistance not  
144 only to 5FC but also to 5FU. In contrast, *fcy1* and *fcy2* mutations confer resistance to only 5FC.  
145 To define the mechanism underlying 5FC resistance in *C. deuterogattii*, 29 resistant colonies  
146 were isolated and tested, originating from the wildtype (R265, 9 colonies) and from two  
147 independent *msh2* $\Delta$  mutants derived in the R265 background (RBB17, 10 colonies and RBB18,  
148 10 colonies). Cultures were started from independent colonies and a single resistant colony was  
149 selected from each culture, so that only one resistant isolate is derived from any original colony  
150 derived from the frozen stock. All of the 5FC resistant isolates (Table 1) acquired were cross-  
151 resistant to 5FU (29/29) (Figure 3A), leading us to hypothesize that resistance to 5FC in *C.*  
152 *deuterogattii* was most commonly mediated by mutations in *FURI*.

153         However, when the *FURI* gene was sequenced in this set of 5FC/5FU resistant isolates,  
154 unexpectedly, only three out of 29 isolates (10.3%) were found to have sustained mutations in  
155 *FURI* (R265-3, R265-4, and R265-6) (Table 1), although PCR amplification of the *FURI* locus  
156 failed for another 3 isolates (R265-2, R265-7, R265-8), suggesting a possible large deletion or  
157 insertion event. Because *fur1* mutations were the only known cause of 5FC/5FU cross-resistance,  
158 we performed whole genome Illumina sequencing on a subset of the remaining isolates (22  
159 isolates) to identify unknown genes underlying resistance. We sequenced the whole genomes of  
160 5 additional R265 isolates, 8 additional RBB17 isolates, and 9 additional RBB18 isolates, for a  
161 total of 22 5FC and 5FU resistant isolates.

162         From the sequenced genomes, reads were aligned to the R265 reference genome and  
163 SNPs and indels were identified. This analysis revealed that one pair of the presumed  
164 independent isolates were in fact siblings (RBB17-3 and RBB17-4), resulting in a total of 5

165 independent R265 genomes, 7 independent RBB17 genomes, and 9 independent RBB18  
166 genomes (21 total independent isolates).

167         Of these 21 independent genome sequences, six contained unambiguous mutations in  
168 *FURI* that were not detected by Sanger sequencing. The first *fur1* mutation discovered by whole  
169 genome sequencing was a single base deletion that introduced a frameshift (R265-1). Two sets of  
170 homopolymer shifts were also identified in *FURI*: a single base deletion in a 6xA homopolymer  
171 run at position 1358 found in three independent isolates (RBB17-5, RBB18-2, and RBB18-5)  
172 and a single base deletion in a 5xT homopolymer run at position 1027. Finally, a mutation within  
173 a splice acceptor (G to A) was identified at position 448 (RBB17-8).

174         For three 5FC resistant R265 strains (R265-2, R265-7, R265-8), PCR amplification of the  
175 *FURI* locus failed and subsequent whole genome sequencing revealed regional deletions  
176 consistent with these failed PCRs. For two strains, break points were clearly identifiable. R265-7  
177 sustained a deletion of bases 189022-203758 (14,736 bp) surrounding *FURI*, while R265-8  
178 sustained a deletion of bases 190136-216860 (26,724 bp), also including *FURI*. For R265-2, one  
179 end of the deletion lies within *FURI*, eliminating one of the primer binding sites and consistent  
180 with the failed PCR. The other end of the ~18.5 kb deletion fell within a sequencing gap of the  
181 annotated V2 R265 reference genome. To identify the precise location of this second breakpoint,  
182 reads from R265-2 were mapped to a recent Nanopore and Illumina hybrid assembly of the R265  
183 strain [26]. Interestingly, the second breakpoint was found within a gene encoding a weak  
184 paralog of *FURI* ( $5 \times 10^{-10}$  protein BLAST e-value). This paralog (CNBG\_4055) is also present  
185 in *C. neoformans* (CNAG\_2344), suggesting that if it arose via duplication, it was before the last  
186 common ancestor to both species. Given that deletion of *FURI* confers resistance to 5FC and  
187 5FU, it is unlikely that this paralog performs the same function as Fur1 (Figure 3A). Despite the

188 protein similarity, no obvious nucleotide homology was found that may have mediated this large  
189 deletion conferring 5FC resistance. In fact, the *FURI* paralog is inverted relative to *FURI*,  
190 reducing the likelihood that remnant homology may have generated a region susceptible to  
191 frequent homology-mediated deletion of *FURI* that would yield the type of regional deletion  
192 observed here.

193 A Trp167STOP mutation in *FCY2* (CNBG\_3227) was also detected in the sequenced set  
194 (RBB18-4). Mutations in *FCY2* were unexpected because in other fungi they do not confer  
195 resistance to 5FU and because there are 2 additional paralogs with substantial similarity to *FCY2*  
196 present in the *Cryptococcus* genome. Because this *fcy2* strain also contains a second mutation in  
197 a gene that plays a role in 5FC and 5FU resistance (discussed below), the *fcy2* mutation may be  
198 unrelated to drug resistance or may enhance resistance in the presence of the second mutation.  
199 We attempted to test the ortholog of *FCY2* from *Cryptococcus neoformans* using a deletion  
200 collection strain but found that the mutant in the collection retained a functional copy of the  
201 *FCY2* gene. However, *fcy2* deletion has recently been reported to confer resistance to 5FC in *C.*  
202 *deuterogattii* [12].

203 In total, out of 29 original 5FC resistant strains (Table 1), twelve independent *fur1*  
204 mutations were identified using Sanger and Illumina sequencing. One independent *fcy2* mutation  
205 was identified by Illumina sequencing. We did not identify any *fcy1* mutations, although *fcy1*  
206 mutations confer resistance to 5FC in *C. neoformans* (Supplemental Figure 2). In total, 11  
207 sequenced genomes representing 10 independent isolates remained with no mutations in any  
208 genes previously described to have a role in 5FC or 5FU resistance. These genomes were  
209 examined to identify novel candidate mutations. To distinguish causal variants from background  
210 mutations, candidate genes were required to be mutated in at least two different independent

211 isolates. Variant impact was also scored using SNPeff [27] and mutations were not considered if  
212 predicted to have low impact (i.e., synonymous, intronic, or non-coding variants). Mutations of  
213 moderate or higher impact were identified at a total of 128 sites (Supplemental Table 3). To  
214 further prioritize, we specifically focused on mutations that were present in isolates from more  
215 than one of the parental backgrounds. We identified *UXSI*, which sustained four novel mutations  
216 in four isolates from two parental backgrounds (Figure 3B).

217 *UXSI* encodes the enzyme that converts UDP-glucuronic acid to UDP-xylose [28]. This  
218 pathway is critical for the formation of the capsule, a core virulence trait of *Cryptococcus*, and  
219 for synthesis of other glycoconjugates. There is no *UXSI* ortholog in either *Saccharomyces*  
220 *cerevisiae* or *Candida albicans*, where many of the resistance mechanisms for 5FC were  
221 elucidated. The mutations in *UXSI* included a single base deletion in a 3xT homopolymer  
222 (R265-5), a single base insertion in a 7xC homopolymer (RBB18-8), and a missense mutation  
223 (Tyr217Cys, RBB18-9) (Figure 3B, Table 1). Finally, a *uxsI* mutation (Asp306Gly) was  
224 identified in the isolate previously identified to have an *fcy2* mutation (RBB18-4). In sum, 9  
225 sequenced genomes representing 8 independent isolates remained for which we were unable to  
226 identify a mutation that conferred resistance to 5FC and 5FU, all derived from *msh2* mutant  
227 isolates.

228 To confirm the role of *uxsI* mutation in resistance to 5FC and 5FU, a *uxsI* deletion  
229 available from a *C. neoformans* deletion collection was employed (Figure 4A). This *uxsI*Δ strain  
230 was completely resistant to both drugs, suggesting that all three alleles isolated were likely loss  
231 of function mutations because they shared a drug resistance phenotype with the null mutant. We  
232 tested the MIC of 5FC for *uxsI* and *fur1* mutants in both YPD and YNB using a broth  
233 microdilution assay. Both *uxsI* and *fur1* mutants were resistant to 5FC above the limits of our

234 assays (MIC > 400  $\mu\text{g}/\text{mL}$  in YPD and >4  $\mu\text{g}/\text{mL}$  in YNB) while the wildtype parent strains  
235 were sensitive at 200  $\mu\text{g}/\text{mL}$  in YPD and 0.5  $\mu\text{g}/\text{mL}$  in YNB (Table 2).

236 We next sought to genetically define the mechanism by which drug resistance may be  
237 mediated by loss of *uxs1* function. Multiple models were considered to explain why 5FC/5FU  
238 toxicity would require Uxs1. The first was that Uxs1 directly converts 5FU into a toxic product.  
239 If so, Uxs1 and Fur1 would function in the same pathway, as either mutant independently  
240 confers drug resistance. This hypothesis was tested using an overexpression allele of *UXS1* that  
241 is driven by the actin promoter [29]. If this hypothesis were correct, we would expect to observe  
242 additional sensitivity conferred by the overexpression allele compared to wildtype. By reducing  
243 the amount of 5FU used to only 1  $\mu\text{g}/\text{mL}$ , wildtype strains were only partially inhibited.  
244 However, introduction of an overexpression allele of *UXS1* did not increase sensitivity (Figure  
245 4B). This suggests that Uxs1 does not act by converting 5FU or a 5FU derivative into a toxic  
246 product.

247 We next tested whether 5FC resistance in *uxs1* mutants may occur through an indirect  
248 effect of the role of Uxs1 in synthesis of UDP-xylose. UDP-xylose is the donor molecule for  
249 xylose addition to glycans, a process that primarily occurs in the secretory compartment. If  
250 xylosylation of an unknown glycoconjugate is required to mediate 5FC toxicity, mutation of  
251 *UXS1* would indirectly confer drug resistance. To test this, deletion mutants lacking transporters  
252 that move UDP-xylose into the secretory compartment (*uxt1*, *uxt2*, and a *uxt1 uxt2* double mutant  
253 [30]) or that lack Golgi xylosyl-transferases that act in protein, glycolipid, and polysaccharide  
254 synthesis (*cxt1* [31], *cxt2*, and a *cxt1 cxt2* double mutant) were analyzed. None of these mutants  
255 demonstrated any change in sensitivity to 5FC or 5FU (Figure 4C). However, these data did not  
256 rule out a requirement for a (previously undescribed) cytoplasmic xylosyl protein modification.

257 To test this hypothesis, a mutant that cannot generate UDP-glucuronic acid, the immediate  
258 precursor for UDP-xylose synthesis was used. This mutant (*ugd1*) is somewhat growth impaired  
259 relative to wildtype and cannot grow on YNB media. However, it does grow, albeit poorly, on  
260 rich YPD media, where it clearly exhibited sensitivity to 5FC. This result demonstrated that  
261 xylose modification, in any cellular compartment, is not required for 5FC toxicity (Figure 4D).

262 The previous models ruled out the lack of UDP-xylose for synthetic processes as an  
263 explanation for 5FC resistance. Another result of the loss of *UXS1* function is the accumulation  
264 of UDP-glucuronic acid, the immediate precursor in the production of UDP-xylose. Past studies  
265 have shown that UDP-glucuronic acid accumulates to extremely high levels in *uxs1* mutant cells,  
266 while it is undetectable in *ugd1* mutants [32]. To test whether this mediates resistance, we  
267 generated a *uxs1 ugd1* double mutant, which should produce neither UDP-glucuronic acid nor  
268 UDP-xylose [32]. While the *uxs1 ugd1* mutant was growth impaired, like the *ugd1* single mutant,  
269 it was clearly sensitive to 5FC (Figure 4D). That *uxs1* mutants are 5FC resistant, whereas *uxs1*  
270 *ugd1* double mutants are restored to 5FC sensitivity suggests that accumulation of UDP-  
271 glucuronic acid in *uxs1* mutants mediates resistance to 5FC and 5FU (Figure 5).

272



## 273 **Discussion**

274 Treating fungal diseases is complicated both by the limited number of drugs that  
275 effectively treat infection without harming the patient and by the rapid rate at which fungi  
276 develop resistance to the few drugs that are effective. 5FC is a particularly emblematic example  
277 of this issue, as it is highly efficacious with limited toxicity. Human cells lack the ability to  
278 convert 5FC to 5FU and toxicity is conferred only by the conversion of 5FC to the  
279 chemotherapeutic 5FU by a patient's microbiota [33]. However, 5FC is ineffective when used  
280 for solo treatment because fungal resistance rapidly emerges. Here, we demonstrate that DNA  
281 mismatch repair mutants exhibit accelerated acquisition of resistance to 5FC. Evolutionary  
282 theory predicts that hypermutators should be rare in eukaryotic microbes because sex unlinks  
283 mutator alleles from the mutations they generate, eliminating the advantage of an elevated  
284 mutation rate and leaving only the general decrease in fitness from introduced mutations [34].  
285 This result lends further support to the recent appreciation that mismatch repair mutants may be  
286 common in pathogenic fungi in part because treatment with antifungal drugs increases selection  
287 for mutations that generate resistance [13,14,16,17].

288 We explored the underlying genetic and genomic basis of 5FC resistance. The resistant  
289 mutants in *C. deuterogattii* selected here were cross-resistant to 5FU. Sanger and whole genome  
290 Illumina sequencing identified a presumptive genetic basis for drug resistance in 16 independent  
291 isolates. Analysis of resistance loci from whole genome data was relatively facile in wildtype  
292 strains (5/5 strains assigned a causative mutation), where an average of 1.2 coding mutations  
293 (range 0-3) were identified by whole genome sequencing, including the putative resistance  
294 mutation, relative to the reference. However, this analysis was substantially more difficult in  
295 mutator strains (8/17) where an average of 11.47 coding mutations were found per strain (range

296 2-25), with numerous additional noncoding or synonymous mutations. For the purposes of  
297 identifying the genetic basis of a trait that occurs at a high rate in wildtype, future studies would  
298 be advised to avoid mutations that increase mutation rate, as they contribute to background noise.

299 We identified multiple mutations in the *FURI* locus (12 of the 16 identified causative  
300 mutations). *fur1* mutations occurred through multiple mechanisms, including regional deletions,  
301 homopolymer tract length changes that introduced frameshift mutations, and a splice site  
302 acceptor point mutation. Surprisingly, we did not identify mutations in *FCY1* or mutations in  
303 *FCY2* that were unaccompanied by a second resistance mutation. Although we selected with only  
304 5FC, all drug resistant isolates were cross-resistant to 5FU as well. One possible explanation is  
305 that selection with 100 µg/mL of 5FC may be above the MIC for *fcy1* or *fcy2* mutants in *C.*  
306 *deuterogattii*, although *fcy1* mutants in *C. neoformans* are resistant to 100 µg/mL of 5FC  
307 (Supplemental Figure 2). Further experiments will be necessary to test this hypothesis, which  
308 could provide guidance into treatment levels for 5FC. Further experiments based on this  
309 hypothesis could provide insight into the function of the other *FCY2* paralogs, perhaps as lower  
310 affinity transporters of 5FC that confer toxicity at higher concentrations of 5FC.

311 Mutations in *UXS1* are particularly interesting as a mechanism of resistance in  
312 *Cryptococcus* because *Uxs1* catalyzes the production of UDP-xylose, the donor molecule for  
313 essential components of Cryptococcal capsule polysaccharides. Strains lacking *UXS1* are  
314 hypocapsular with altered capsule structure [32]. In addition, *uxs1* mutants are avirulent in a  
315 murine tail-vein injection disseminated infection model [35]. This suggests that *uxs1* mutants  
316 might be unlikely to emerge during exposure to 5FC *in vivo*, even though they represent a  
317 substantial proportion of the resistant isolates observed in this study. Likewise, regional deletions  
318 including *FURI* affected multiple neighboring genes as well, including the direct neighboring

319 gene *GIS2*. *Gis2* has previously been described to play a role in stress tolerance, including  
320 fluconazole and oxidative stress tolerance [36]. Like *uxs1* mutants, these regional deletion  
321 mutants may be less likely to emerge *in vivo*. It is important to note that *in vitro* resistance to  
322 5FC is not necessarily associated with clinical treatment failure and does not prevent synergy of  
323 combination treatment with Amphotericin B and flucytosine [37]. Continued selection by 5FC  
324 treatment of a deleterious resistance allele like a *uxs1* mutation or a collateral *gis2* deletion might  
325 explain the maintenance of synergy. Future studies examining the mechanisms of resistance  
326 during treatment with 5FC *in vivo* will provide further insights into the possible contribution of  
327 each of these mechanisms to resistance in patients.

328         This study also illustrates the importance of examining drug resistance in the context of  
329 the pathogen being treated. Previous work in *C. albicans* and *S. cerevisiae* suggested that  
330 resistance would occur through mutations in *FURI*, but both species are evolutionarily distant  
331 from *Cryptococcus* and lack a *UXS1* ortholog. While these previous studies provided substantial  
332 insight into 5FC toxicity, studies in the pathogen of interest are essential. Surprisingly, one strain  
333 (RBB18-4) that was cross resistant to 5FU had a mutation in the *FCY2* gene (CNBG\_3227),  
334 which in other species confers resistance to 5FC but not 5FU. Mutation of *FCY2* is known to  
335 result in resistance to 5FC in *C. deuterogattii*, but cross-resistance to 5FU has not been tested  
336 [12]. Unexpected cross-resistance between 5FC and fluconazole has been previously observed in  
337 *fcy2* mutants of *Candida lusitanae* but is proposed to occur through competitive inhibition of  
338 fluconazole uptake by 5FC that can no longer enter through *Fcy2*-mediated transport [8,38,39].  
339 *C. lusitanae fcy2* mutants are not resistant to fluconazole without the addition of 5FC. In  
340 addition, multiple resistant strains were not assigned a presumptive causative mutation here and  
341 lacked mutations in any genes known to cause 5FC resistance from this or previous work (*FURI*,

342 *FCY1*, *FCY2*, and *UXS1*). Presumably unknown mechanisms are responsible for resistance to  
343 5FC and 5FU in these strains as well, either in pathways unique to *Cryptococcus* or potentially  
344 more broadly conserved.

345 In addition, *UXS1* mutations provide unexpected insight into interaction between  
346 nucleotide synthesis and generation of precursors for xylosylation. Surprisingly, accumulation of  
347 UDP-glucuronic acid appears to either inhibit the pyrimidine salvage pathway or activate  
348 thymidylate synthase (Figure 5). This suggests that UDP-glucuronic acid may have a role as a  
349 source of UDP for the cell, while UDP-xylose does not. While *UXS1* orthologs are not found in  
350 *C. albicans* or *S. cerevisiae*, which lack xylose modifications, there is a *UXS1* ortholog in  
351 humans. 5FU is commonly used as a chemotherapeutic drug [40], and resistance to 5FU is  
352 frequently associated with mutations in thymidylate synthase [41]. Data here suggest that *uxs1*  
353 mutations may be acting in a similar fashion to either de-repress thymidylate synthase or inhibit  
354 Fur1 (Figure 5). Further exploration of the role of Uxs1 orthologs in humans during 5FU  
355 chemotherapy may be of interest.

356

## 357 **Material and methods**

### 358 **Strains and media**

359           The strains and plasmids used in this study are listed in Table S1. The strains were  
360 maintained in 25% glycerol stocks at -80°C and grown on rich YPD media at 30°C (Yeast  
361 extract Peptone Dextrose). Strains with selectable markers were grown on YPD containing 100  
362 µg/mL nourseothricin (NAT) and/or 200 µg/mL G418 (NEO).

363

### 364 **Genome sequencing**

365           DNA was isolated for sequencing by expanding individual colonies to 50 mL liquid  
366 cultures in YPD at 30°C. Cultures were then frozen and lyophilized until dry. DNA was  
367 extracted using a standard CTAB extraction protocol as previously described [42]. Illumina  
368 paired-end libraries were prepared and sequenced by the University of North Carolina Next  
369 Generation Sequencing Facility using the Kapa Library prep kit and the Hiseq platform.  
370 Additional sequencing was performed by the Duke University Sequencing Core using the Kapa  
371 Hyper prep kit and performed using a NovaSeq platform. Raw reads are available through the  
372 Sequence Read Archive under project accession number PRJNA525019.

373

### 374 **Genome assembly and variant calling**

375           Reads were aligned to the V2 R265 reference genome [43] using BWA-MEM [44].  
376 Alignments were further processed with SAMtools [45], the Genome Analysis Toolkit (GATK)  
377 [46], and Picard. SNP and indel calling was performed using the Unified Genotyper Component  
378 of the GATK with default settings aside from ploidy=1. VCFtools [47] was utilized for  
379 processing of the resulting calls to remove sites common to all strains (errors in the reference  
380 assembly) and variants were annotated using SnpEff [27]. All remaining variant calls were

381 visually examined using the Integrated Genome Viewer (IGV) to remove calls resulting from  
382 poor read mapping [48]. FungiDB was also used to determine putative function and orthology of  
383 genes containing called variants in the dataset [49].

384

### 385 **Strain construction**

386 A *ugd1*Δ mutant was constructed in the KN99a background as follows. Primers pairs  
387 JOHE45233/JOHE45085, JOHE45086/JOHE45087, and JOHE45088/JOHE45234 were used to  
388 amplify 1 kb upstream of *UGD1*, the neomycin resistant marker, and 1 kb downstream of the  
389 *UGD1* gene, respectively (primer sequences available in Table S2). To generate the deletion  
390 allele for *C. neoformans* transformation, all three fragments were cloned into plasmid pRS426 by  
391 transforming *S. cerevisiae* strain FY834 as previously described [50]. Recombinant *S. cerevisiae*  
392 transformants were selected on SD-uracil media and verified by spanning PCR with primer pair  
393 JOHE45233/JOHE45234. The resulting PCR product was introduced into *C. neoformans*  
394 laboratory strain KN99a by biolistic transformation and transformants were selected on YPD  
395 containing neomycin. Putative *ugd1*Δ deletion mutants were confirmed by PCR.

396 *uxs1*Δ single mutants and *ugd1*Δ *uxs1*Δ double mutants were generated via a genetic  
397 cross [51]. First, the KN99a *uxs1*Δ mutant from the Hiten Madhani deletion collection was  
398 mated with the wild-type KN99a laboratory strain. Through microdissection, spores were  
399 isolated, germinated, and genotyped via PCR for the gene deletion and the mating type locus to  
400 isolate a *MATa* *uxs1*Δ mutant in the KN99 background. Second, the KN99a *uxs1*Δ mutant was  
401 mated with wild-type H99. Spores were dissected and genotyped via PCR for the gene deletion  
402 and the mating type locus to isolate H99 *uxs1*Δ single mutants. Finally, the H99 *uxs1*Δ single

403 mutant was crossed with KN99a *ugd1Δ* to generate *ugd1Δ uxs1Δ* double mutants, and the H99  
404 *ugd1Δ* single mutant.

405

#### 406 **Spot dilution assays**

407 Single colonies were inoculated into 5 mL of liquid YPD and grown overnight at 30°C.  
408 Cell density was determined using a hemocytometer and the cultures were diluted accordingly  
409 such that 100,000 cells were aliquoted on to the most concentrated spot and subsequent spots  
410 consisted of 10-fold dilutions per spot. Each strain was spotted onto YPD or YNB alone and onto  
411 media also containing 5FC or 5FU at the indicated concentration. Plates were incubated at 30°C  
412 until photographed.

413

#### 414 **Swab assays**

415 Swab assays were conducted as previously described [13]. To isolate independent drug  
416 resistant strains, the original parent strains were subcultured from a frozen glycerol stock. Single  
417 colonies were used to inoculate liquid YPD cultures without selection. Those liquid cultures  
418 were grown with shaking until saturation. They were then spread onto drug plates (100 μg/mL  
419 5FC on YNB) using sterile cotton swabs to select for resistant colonies. A single drug resistant  
420 colony was taken from any given liquid culture to ensure independence. This assay is only semi-  
421 quantitative, as the inoculum is not strictly controlled between independent cultures when  
422 swabbing.

423

424

425

## 426 **MIC Testing**

427           5-flucytosine was dissolved in water and added to liquid YPD media in a 96-well plate at  
428 400 µg/mL. 2-fold serial dilutions were performed until a concentration of 1.56 µg/mL was  
429 achieved. For YNB, 5-flucytosine was dissolved in water and added to liquid YNB media in a  
430 96-well plate at 4 µg/mL. 2-fold serial dilutions were performed until a concentration of 0.016  
431 µg/mL was achieved. Cell density of overnight cultures (liquid YPD, 30°C) was determined  
432 using a hemocytometer and cultures were adjusted to 10<sup>5</sup> cells/mL. 100 µl of cell suspension was  
433 added to each well (10,000 cells per well). The 96-well plate was incubated at 30°C and OD600  
434 readings were taken daily using a Sunrise Tecan instrument and Magellan software.

435

## 436 **Data Availability**

437           Raw reads are available through the Sequence Read Archive under project accession  
438 number PRJNA525019. Strains generated in this study are available upon request.

439

## 440 **Acknowledgements**

441           This study was supported by NIH/NIAID R37 MERIT award AI39115-21, NIH/NIAID  
442 R01 AI50113-15, NIH/NIAID R01 AI112595-04, and NIH/NIAID P01 AI104533-05 to J.H.;  
443 NIH/NIAID R21 AI109623 to T.L.D; and NIH/NIAID F30 AI120339 to L.X.L. This study  
444 utilized a *Cryptococcus* gene deletion collection deposited at the Fungal Genetics Stock Center  
445 and made freely available ahead of publication by the Madhani laboratory and funded by NIH  
446 R01 AI100272.

447



## 448 References

- 449 1. Brown GD, Denning DW, Gow NAR, Levitz SM, Netea MG, White TC. Hidden killers:  
450 human fungal infections. *Sci Transl Med*. 2012;4: 165rv13.
- 451 2. Rajasingham R, Smith RM, Park BJ, Jarvis JN, Govender NP, Chiller TM, et al. Global  
452 burden of disease of HIV-associated cryptococcal meningitis: an updated analysis. *Lancet*  
453 *Infect Dis*. 2017;17: 873–881.
- 454 3. Saag MS, Graybill RJ, Larsen RA, Pappas PG, Perfect JR, Powderly WG, et al. Practice  
455 guidelines for the management of Cryptococcal disease. *Clin Infect Dis*. 2000;30: 710–  
456 718.
- 457 4. Bennett JE, Dismukes WE, Duma RJ, Medoff G, Sande MA, Gallis H, et al. A  
458 comparison of amphotericin B alone and combined with flucytosine in the treatment of  
459 cryptococcal meningitis. *N Engl J Med*. 1979;301: 126–131.
- 460 5. Molloy SF, Kanyama C, Heyderman RS, Loyse A, Kouanfack C, Chanda D, et al.  
461 Antifungal combinations for treatment of Cryptococcal meningitis in Africa. *N Engl J*  
462 *Med*. 2018;378: 1004–1017.
- 463 6. Loyse A, Dromer F, Day J, Lortholary O, Harrison TS. Flucytosine and cryptococcosis:  
464 time to urgently address the worldwide accessibility of a 50-year-old antifungal. *J*  
465 *Antimicrob Chemother*. 2013;68: 2435–2444.
- 466 7. Hope W, Taberner L, Denning D, Anderson M. Molecular mechanisms of primary  
467 resistance to flucytosine in *Candida albicans*. *Antimicrob Agents Chemother*. 2004;48:  
468 4377–4386.
- 469 8. Papon N, Noël T, Florent M, Gibot-Leclerc S, Jean D, Chastin C, et al. Molecular  
470 mechanism of flucytosine resistance in *Candida lusitanae*: contribution of the *FCY2*,  
471 *FCY1*, and *FUR1* genes to 5-fluorouracil and fluconazole cross-resistance. *Antimicrob*  
472 *Agents Chemother*. 2007;51: 369–371.
- 473 9. McManus BA, Moran GP, Higgins JA, Sullivan DJ, Coleman DC. A Ser29Leu  
474 substitution in the cytosine deaminase Fca1p is responsible for clade-specific flucytosine  
475 resistance in *Candida dubliniensis*. *Antimicrob Agents Chemother*. 2009;53: 4678–4685.
- 476 10. Whelan WL. The genetic basis of resistance to 5-fluorocytosine in *Candida* species and  
477 *Cryptococcus neoformans*. *CRC Crit Rev Microbiol*. 1987;15: 45–56.
- 478 11. Vu K, Thompson George R III, Roe CC, Sykes JE, Dreibe EM, Lockhart SR, et al.  
479 Flucytosine resistance in *Cryptococcus gattii* is indirectly mediated by the *FCY2-FCY1-*  
480 *FUR1* pathway. *Med Mycol*. 2018;56: 857–867.
- 481 12. Khanal Lamichhane A, Garraffo HM, Cai H, Walter PJ, Kwon-Chung KJ, Chang YC. A  
482 novel role of fungal type I myosin in regulating membrane properties and its association  
483 with D-amino acid utilization in *Cryptococcus gattii*. *mBio*. 2019;10: e01867-19.
- 484 13. Billmyre RB, Clancey SA, Heitman J. Natural mismatch repair mutations mediate  
485 phenotypic diversity and drug resistance in *Cryptococcus deuterogattii*. *eLife*. 2017;6:  
486 e28802.
- 487 14. Boyce KJ, Wang Y, Verma S, Shakya VPS, Xue C, Idnurm A. Mismatch repair of DNA  
488 replication errors contributes to microevolution in the pathogenic fungus *Cryptococcus*  
489 *neoformans*. *mBio*. 2017;8.
- 490 15. Billmyre RB, Croll D, Li W, Mieczkowski P, Carter DA, Cuomo CA, et al. Highly  
491 recombinant VGII *Cryptococcus gattii* population develops clonal outbreak clusters  
492 through both sexual macroevolution and asexual microevolution. *mBio*. 2014;5: e01494-

- 493 14.  
494 16. Rhodes J, Beale MA, Vanhove M, Jarvis JN, Kannambath S, Simpson JA, et al. A  
495 population genomics approach to assessing the genetic basis of within-host  
496 microevolution underlying recurrent cryptococcal meningitis infection. *G3*. 2017;7: 1165–  
497 1176.  
498 17. Healey KR, Zhao Y, Perez WB, Lockhart SR, Sobel JD, Farmakiotis D, et al. Prevalent  
499 mutator genotype identified in fungal pathogen *Candida glabrata* promotes multi-drug  
500 resistance. *Nat Commun*. 2016;7: 11128.  
501 18. Dellière S, Healey K, Gits-Muselli M, Carrara B, Barbaro A, Guigue N, et al. Fluconazole  
502 and echinocandin resistance of *Candida glabrata* correlates better with antifungal drug  
503 exposure rather than with *MSH2* mutator genotype in a French cohort of patients  
504 harboring low rates of resistance. *Front Microbiol*. 2016;7: 2038.  
505 19. Healey KR, Jimenez Ortigosa C, Shor E, Perlin DS. Genetic drivers of multidrug  
506 resistance in *Candida glabrata*. *Front Microbiol*. 2016;7: 1995.  
507 20. Singh A, Healey KR, Yadav P, Upadhyaya G, Sachdeva N, Sarma S, et al. Absence of  
508 azole or echinocandin resistance in *Candida glabrata* isolates in India despite  
509 background prevalence of strains with defects in the DNA mismatch repair pathway.  
510 *Antimicrob Agents Chemother*. 2018;62: e00195-18.  
511 21. Steenwyk JL, Opulente DA, Kominek J, Shen X-X, Zhou X, Labella AL, et al. Extensive  
512 loss of cell-cycle and DNA repair genes in an ancient lineage of bipolar budding yeasts.  
513 *PLOS Biol*. 2019;17: e3000255.  
514 22. Hagen F, Khayhan K, Theelen B, Kolecka A, Polacheck I, Sionov E, et al. Recognition of  
515 seven species in the *Cryptococcus gattii/Cryptococcus neoformans* species complex.  
516 *Fungal Genet Biol*. 2015;78: 16–48.  
517 23. Rhodes J, Desjardins CA, Sykes SM, Beale MA, Vanhove M, Sakthikumar S, et al.  
518 Tracing genetic exchange and biogeography of *Cryptococcus neoformans* var. *grubii*  
519 at the global population level. *Genetics*. 2017;207: 327–346.  
520 24. Kwon-Chung KJ, Bennett JE, Wickes BL, Meyer W, Cuomo CA, Wollenburg KR, et al.  
521 The case for adopting the “Species Complex” nomenclature for the etiologic agents of  
522 Cryptococcosis. *mSphere*. 2017;2.  
523 25. Gsaller F, Furukawa T, Carr PD, Rash B, Jöchl C, Bertuzzi M, et al. Mechanistic basis of  
524 pH-dependent 5-flucytosine resistance in *Aspergillus fumigatus*. *Antimicrob Agents*  
525 *Chemother*. 2018;62: e02593-17.  
526 26. Yadav V, Sun S, Billmyre RB, Thimmappa BC, Shea T, Lintner R, et al. RNAi is a  
527 critical determinant of centromere evolution in closely related fungi. *Proc Natl Acad Sci*.  
528 2018;115: 3108–3113.  
529 27. Cingolani P, Platts A, Wang LL, Coon M, Nguyen T, Wang L, et al. A program for  
530 annotating and predicting the effects of single nucleotide polymorphisms, SnpEff: SNPs in  
531 the genome of *Drosophila melanogaster* strain w1118; iso-2; iso-3. *Fly*. 2012;6: 80–92.  
532 28. Bar-Peled M, Griffith CL, Doering TL. Functional cloning and characterization of a UDP-  
533 glucuronic acid decarboxylase: the pathogenic fungus *Cryptococcus neoformans*  
534 elucidates UDP-xylose synthesis. *Proc Natl Acad Sci*. 2001;98: 12003 LP – 12008.  
535 29. Gish SR, Maier EJ, Haynes BC, Santiago-Tirado FH, Srikanta DL, Ma CZ, et al.  
536 Computational analysis reveals a key regulator of cryptococcal virulence and determinant  
537 of host response. *mBio*. 2016;7: e00313-16.  
538 30. Li LX, Rautengarten C, Heazlewood JL, Doering TL. Xylose donor transport is critical for

- 539 fungal virulence. PLoS Pathog. 2018;14: e1006765.
- 540 31. Klutts JS, Doering TL. Cryptococcal xylosyltransferase 1 (Cxt1p) from *Cryptococcus*  
541 *neoformans* plays a direct role in the synthesis of capsule polysaccharides. J Biol Chem.  
542 2008;283: 14327–14334.
- 543 32. Griffith CL, Klutts JS, Zhang L, Levery SB, Doering TL. UDP-glucose dehydrogenase  
544 plays multiple roles in the biology of the pathogenic fungus *Cryptococcus neoformans*. J  
545 Biol Chem. 2004;279: 51669–51676.
- 546 33. Harris BE, Manning BW, Federle TW, Diasio RB. Conversion of 5-fluorocytosine to 5-  
547 fluorouracil by human intestinal microflora. Antimicrob Agents Chemother. 1986;29: 44–  
548 48.
- 549 34. Tenaillon O, Le Nagard H, Godelle B, Taddei F. Mutators and sex in bacteria: conflict  
550 between adaptive strategies. Proc Natl Acad Sci U S A. 2000;97: 10465–70.
- 551 35. Moyrand F, Klaproth B, Himmelreich U, Dromer F, Janbon G. Isolation and  
552 characterization of capsule structure mutant strains of *Cryptococcus neoformans*. Mol  
553 Microbiol. 2002;45: 837–849.
- 554 36. Leipheimer J, Bloom ALM, Baumstark T, Panepinto JC. CNBP homologues Gis2 and  
555 Znf9 interact with a putative G-quadruplex-forming 3' untranslated region, altering  
556 polysome association and stress tolerance in *Cryptococcus neoformans*. mSphere. 2018;3:  
557 e00201-18.
- 558 37. Schwarz P, Janbon G, Dromer F, Lortholary O, Dannaoui E. Combination of amphotericin  
559 B with flucytosine is active in vitro against flucytosine-resistant isolates of *Cryptococcus*  
560 *neoformans*. Antimicrob Agents Chemother. 2007;51: 383–385.
- 561 38. Chapeland-Leclerc F, Bouchoux J, Goumar A, Chastin C, Villard J, Noel T. Inactivation  
562 of the *FCY2* gene encoding purine-cytosine permease promotes cross-resistance to  
563 flucytosine and fluconazole in *Candida lusitanae*. Antimicrob Agents Chemother.  
564 2005;49: 3101–3108.
- 565 39. Florent M, Noel T, Ruprich-Robert G, Da Silva B, Fitton-Ouhabi V, Chastin C, et al.  
566 Nonsense and missense mutations in *FCY2* and *FCY1* genes are responsible for  
567 flucytosine resistance and flucytosine-fluconazole cross-resistance in clinical isolates of  
568 *Candida lusitanae*. Antimicrob Agents Chemother. 2009;53: 2982–2990.
- 569 40. Moertel CG. Chemotherapy for colorectal cancer. N Engl J Med. 1994;330: 1136–1142.
- 570 41. Pullarkat ST, Stoehlmacher J, Ghaderi V, Xiong Y-P, Ingles SA, Sherrod A, et al.  
571 Thymidylate synthase gene polymorphism determines response and toxicity of 5-FU  
572 chemotherapy. Pharmacogenomics J. 2001;1: 65.
- 573 42. Pitkin JW, Panaccione DG, Walton JD. A putative cyclic peptide efflux pump encoded by  
574 the *TOXA* gene of the plant-pathogenic fungus *Cochliobolus carbonum*. Microbiology.  
575 1996;142: 1557–1565.
- 576 43. Farrer RA, Desjardins CA, Sakthikumar S, Gujja S, Saif S, Zeng Q, et al. Genome  
577 evolution and innovation across the four major lineages of *Cryptococcus gattii*. mBio.  
578 2015;6: e00868-15.
- 579 44. Li H, Durbin R. Fast and accurate short read alignment with Burrows-Wheeler transform.  
580 Bioinformatics. 2009;25: 1754–60.
- 581 45. Li H, Handsaker B, Wysoker A, Fennell T, Ruan J, Homer N, et al. The Sequence  
582 Alignment/Map format and SAMtools. Bioinformatics. 2009;25: 2078–9.
- 583 46. McKenna A, Hanna M, Banks E, Sivachenko A, Cibulskis K, Kernysky A, et al. The  
584 Genome Analysis Toolkit: A MapReduce framework for analyzing next-generation DNA

- 585 sequencing data. *Genome Res.* 2010;20: 1297–303.
- 586 47. Danecek P, Auton A, Abecasis G, Albers CA, Banks E, DePristo MA, et al. The variant  
587 call format and VCFtools. *Bioinformatics.* 2011;27: 2156–8.
- 588 48. Thorvaldsdóttir H, Robinson JT, Mesirov JP. Integrative Genomics Viewer (IGV): high-  
589 performance genomics data visualization and exploration. *Brief Bioinform.* 2013;14: 178–  
590 92.
- 591 49. Stajich JE, Harris T, Brunk BP, Brestelli J, Fischer S, Harb OS, et al. FungiDB: an  
592 integrated functional genomics database for fungi. *Nucleic Acids Res.* 2012;40: D675-81.
- 593 50. Ianiri G, Averette AF, Kingsbury JM, Heitman J, Idnurm A. Gene function analysis in the  
594 ubiquitous human commensal and pathogen *Malassezia* genus. *mBio.* 2016;7.
- 595 51. Sun S, Priest SJ, Heitman J. *Cryptococcus neoformans* mating and genetic crosses. *Curr*  
596 *Protoc Microbiol.* 2019;53: e75.  
597  
598

## 599 **Figure legends**

600

601 **Figure 1. 5FC resistance is enhanced by defects in mismatch repair.** A) Swab assays were  
602 conducted using both the wildtype R265 strain and two independent *msh2Δ::NEO* mutants to test  
603 for the ability to generate resistance to 5FC. All three strains developed resistance; however, the  
604 mismatch repair mutants generated resistant isolates at a higher frequency. B) A fluctuation  
605 assay was conducted to compare 5FC resistance quantitatively between wildtype R265 and two  
606 independent *msh2Δ::NEO* mutants. Mutation rate was normalized to the wildtype strain. Both  
607 mutator strains showed a greater than 15-fold increase in the rate of resistance.

608

609 **Figure 2. Exposure to 5FC generates an adaptive advantage for mutator strains.**

610 Competition experiments between a tester strain with a neomycin resistance marker and a  
611 wildtype R265 strain. (Strain used: SEC501, RBB17, RBB18). Overnight cultures were mixed  
612 1:1 and then used to inoculate a second overnight culture in liquid YNB with and without 5FC.  
613 All three marked strains showed a slight growth defect in comparison to the unmarked strain in  
614 nonselective media but only the hypermutator strains demonstrated a dramatic growth advantage  
615 when grown in YNB+5FC. Boxplots show minimum, first quartile, median, third quartile, and  
616 maximum values. Points represent the results from three individual replicates and are  
617 summarized by the box plot. The R265 *NEO<sup>R</sup>* vs wildtype competition is gray, while the  
618 two *msh2Δ::NEO* vs wildtype competitions are dark and light blue.

619

620 **Figure 3. 5FC resistant mutants are cross-resistant to 5FU.**

621 A) Isolates that were selected based on growth on 5FC media were patched to YNB, YNB plus  
622 5FC, and YNB plus 5FU. Each plate has parental and *fur1* mutant controls in the top row.  
623 Hypermulator controls have occasional resistant colonies that emerged in the growth patch.  
624 Sanger sequencing revealed that very few isolates had sustained mutations in *FUR1*. B)  
625 Schematic showing the predicted domains encoded by the *UXS1* gene as well as the location and  
626 number of mutations identified. Nonsense alleles are shown in red and missense are shown in  
627 blue.

628

629 **Figure 4. *uxs1* mutants mediate 5FC resistance through a xylosylation-independent**  
630 **mechanism.**

631 A) KN99 deletion strains from the *C. neoformans* deletion collection show that deletion of *UXS1*  
632 confers resistance to 5FC and 5FU. The RBB18-2 strain carrying a *fur1* mutation is resistant to  
633 5FC and 5FU although more weakly to 5FU. The R265-3 strain carrying a *fur1* mutation is  
634 completely resistant to both drugs. B) Spot dilution assay on YNB, YNB plus 5FC, and YNB  
635 plus 5FU demonstrating overexpression of *UXS1* driven by the actin promoter does not confer  
636 increased sensitivity to 5FC or 5FU. C) Spot dilution assays on YNB, YNB plus 5FC, and YNB  
637 plus 5FU demonstrating that mutants deficient in UDP-xylose transport (*uxt1* $\Delta$ , *uxt2* $\Delta$ , *uxt1* $\Delta$   
638 *uxt2* $\Delta$ ) and xylose transferase mutants (*cxt1* $\Delta$ , *cxt2* $\Delta$ , *cxt1* $\Delta$  *cxt2* $\Delta$ ) show no change in 5FC and  
639 5FU sensitivity. D) Spot dilution assay on YPD, YPD plus 5FC, and YPD plus 5FU showing that  
640 *ugd1* mutants are viable on rich YPD media but retain sensitivity to 5FC and 5FU. In addition,  
641 *ugd1 uxs1* double mutants retain sensitivity to 5FC and 5FU like a *ugd1* single mutant rather than  
642 gain resistance like the *uxs1* single mutant.



643 **Figure 5. Model of inhibition of 5FC/5FU toxicity by *uxs1* mutation.**

644 Potential mechanisms by which *uxs1* mutations may confer resistance to both 5FC and 5FU.  
645 Mutation of *uxs1* causes an accumulation of UDP-glucuronic acid, the product of Ugd1, which  
646 either impairs production of toxic fluoridated molecules or rescues inhibition of the targets of  
647 those fluoridated molecules, such as thymidylate synthase. Protein names are in red for those  
648 where mutations were found in this study.

649

650 **Supplementary Figure 1. VGIIa-like isolates acquire resistance to 5FC and 5FU more**  
651 **rapidly than the VGIIa isolate R265.**

652 VGIIa-like strains NIH444 and CBS7750 that harbor *msh2* nonsense alleles were tested for the  
653 ability to generate resistance to 5FC and 5FU in comparison with the closely related VGIIa strain  
654 R265. For each strain, 5 mL YPD cultures were inoculated from a single colony and grown  
655 overnight at 30°C. After washing, 100 µl of a 10<sup>-5</sup> dilution was plated to YNB control plates and  
656 100 µl of undiluted cultures was plated on media containing 5FC or 5FU. The VGIIa-like strains  
657 generated substantially more isolates resistant to both drugs.

658

659 **Supplementary Figure 2. Mutants of *fcy1* and *fur1* in *Cryptococcus neoformans* are**  
660 **resistant to 5FC but not 5FU.**

661 *fur1*Δ and *fcy1*Δ strains from the KN99 *C. neoformans* collection were struck onto YNB, YNB +  
662 100 µg/mL 5FC, and YNB + 100 µg/mL 5FU. While the *fcy1*Δ mutant strain grew on media  
663 containing 5FC, it did not grow on media containing 5FU. In contrast, the *fur1*Δ mutant strain  
664 grew on media with either drug.

665

666 **Table 1. 5FC-resistant isolates whole genome sequenced or successfully genotyped by**  
 667 **Sanger sequencing.**

| Strain Name | Original Genotype | Putative Resistance Allele                         |
|-------------|-------------------|----------------------------------------------------|
| R265-1      | Wildtype          | <i>fur1</i> 1134delT                               |
| R265-2      | Wildtype          | ~18.5 kb deletion spanning <i>fur1</i>             |
| R265-3      | Wildtype          | <i>fur1</i> 1003delT, mutation detected via Sanger |
| R265-4      | Wildtype          | <i>fur1</i> 1136delT, mutation detected via Sanger |
| R265-5      | Wildtype          | <i>uxs1</i> 1520delT                               |
| R265-6      | Wildtype          | <i>fur1</i> 1440delA, mutation detected via Sanger |
| R265-7      | Wildtype          | ~14.7 kb deletion spanning <i>fur1</i>             |
| R265-8      | Wildtype          | ~26.7 kb deletion spanning <i>fur1</i>             |
| RBB17-1     | <i>msh2Δ::NEO</i> |                                                    |
| RBB17-2     | <i>msh2Δ::NEO</i> |                                                    |
| RBB17-3     | <i>msh2Δ::NEO</i> |                                                    |
| RBB17-4     | <i>msh2Δ::NEO</i> |                                                    |
| RBB17-5     | <i>msh2Δ::NEO</i> | <i>fur1</i> 1358delA in 6 base homopolymer         |
| RBB17-6     | <i>msh2Δ::NEO</i> |                                                    |
| RBB17-7     | <i>msh2Δ::NEO</i> |                                                    |
| RBB17-8     | <i>msh2Δ::NEO</i> | <i>fur1</i> G448A (splice acceptor)                |
| RBB18-1     | <i>msh2Δ::NEO</i> |                                                    |
| RBB18-2     | <i>msh2Δ::NEO</i> | <i>fur1</i> 1358delA in 6 base homopolymer         |
| RBB18-3     | <i>msh2Δ::NEO</i> |                                                    |
| RBB18-4     | <i>msh2Δ::NEO</i> | <i>fcy2</i> Trp167Stop<br><i>uxs1</i> Asp306Gly    |
| RBB18-5     | <i>msh2Δ::NEO</i> | <i>fur1</i> 1358delA in 6 base homopolymer         |
| RBB18-6     | <i>msh2Δ::NEO</i> | <i>fur1</i> 1027delT in 5 base homopolymer         |
| RBB18-7     | <i>msh2Δ::NEO</i> |                                                    |
| RBB18-8     | <i>msh2Δ::NEO</i> | <i>uxs1</i> 1182insC in 7 base homopolymer         |
| RBB18-9     | <i>msh2Δ::NEO</i> | <i>uxs1</i> Tyr217Cys                              |

668

669



670 **Table 2. MIC values for deletion mutants of genes identified in this study**

671

672

| <b>Genetic Background</b> | <b>5FC in YPD</b> | <b>5FC in YNB</b> |
|---------------------------|-------------------|-------------------|
| Wildtype                  | 200 µg/mL         | 0.5 µg/mL         |
| <i>fur1</i>               | >400 µg/mL        | >4 µg/mL          |
| <i>uxs1</i>               | >400 µg/mL        | >4 µg/mL          |

| Strain name | Genotype                                                                                      | Construction or source                                            |
|-------------|-----------------------------------------------------------------------------------------------|-------------------------------------------------------------------|
| RBB17       | R265 <i>MAT<math>\alpha</math> msh2<math>\Delta</math>::NEO</i>                               | Billmyre et al, 2017 [13]                                         |
| RBB18       | R265 <i>MAT<math>\alpha</math> msh2<math>\Delta</math>::NEO</i>                               | Billmyre et al, 2017 [13]                                         |
| SEC612      | KN99 <i>MAT<math>\alpha</math> ugd1<math>\Delta</math>::NEO</i>                               | Biolistic transformation                                          |
| SEC613      | H99 <i>MAT<math>\alpha</math> ugd1<math>\Delta</math>::NEO</i>                                | SEC612 x SEC615                                                   |
| SEC614      | KN99 <i>MAT<math>\alpha</math> uxs1<math>\Delta</math>::NAT</i>                               | KN99 $\alpha$ x KN99 $\alpha$ <i>uxs1<math>\Delta</math>::NAT</i> |
| SEC615      | H99/KN99 <i>MAT<math>\alpha</math> uxs1<math>\Delta</math>::NAT</i>                           | H99 x SEC614                                                      |
| SEC616      | KN99 <i>MAT<math>\alpha</math> ugd1<math>\Delta</math>::NEO uxs1<math>\Delta</math>::NAT</i>  | SEC612 x SEC615                                                   |
| SEC617      | H99 <i>MAT<math>\alpha</math> ugd1<math>\Delta</math>::NEO uxs1<math>\Delta</math>::NAT-1</i> | SEC612 x SEC615                                                   |
| SEC618      | H99 <i>MAT<math>\alpha</math> ugd1<math>\Delta</math>::NEO uxs1<math>\Delta</math>::NAT-2</i> | SEC612 x SEC615                                                   |
| TDY1787     | KN99 <i>MAT<math>\alpha</math> uxs1<math>\Delta</math>::NAT</i>                               | Li et al, 2018 [30]                                               |
| TDY1811     | KN99 <i>MAT<math>\alpha</math> uxs1<math>\Delta</math>::NAT UXSI::NEO</i>                     | Li et al, 2018 [30]                                               |
| TDY1799     | KN99 <i>MAT<math>\alpha</math> P<sub>ACT1</sub> UXSI overexpression (NAT)</i>                 | Gish et al, 2016 [29]                                             |
| TDY1679     | KN99 <i>MAT<math>\alpha</math> uxt1<math>\Delta</math>::NEO</i>                               | Li et al, 2018 [30]                                               |
| TDY1685     | KN99 <i>MAT<math>\alpha</math> uxt2<math>\Delta</math>::NAT</i>                               | Li et al, 2018 [30]                                               |
| TDY1695     | KN99 <i>MAT<math>\alpha</math> uxt1<math>\Delta</math>::NEO uxt2<math>\Delta</math>::NAT</i>  | Li et al, 2018 [30]                                               |
| TDY1076     | KN99 <i>MAT<math>\alpha</math> cxt1<math>\Delta</math>::NAT</i>                               | Klutts et al, 2008 [31]                                           |
| TDY1077     | KN99 <i>MAT<math>\alpha</math> cxt2<math>\Delta</math>::NEO</i>                               | Klutts et al, in preparation                                      |
| TDY1078     | KN99 <i>MAT<math>\alpha</math> cxt1<math>\Delta</math>::NAT cxt2<math>\Delta</math>::NEO</i>  | Klutts et al, in preparation                                      |
|             | KN99 <i>MAT<math>\alpha</math> fur1<math>\Delta</math>::NAT</i>                               | Madhani collection                                                |
|             | KN99 <i>MAT<math>\alpha</math> uxs1<math>\Delta</math>::NAT</i>                               | Madhani collection                                                |
|             | KN99 <i>MAT<math>\alpha</math> fcy1<math>\Delta</math>::NAT</i>                               | Madhani collection                                                |
|             | KN99 <i>MAT<math>\alpha</math> fcy2<math>\Delta</math>::NAT</i>                               | Madhani collection                                                |

673 **Table S1.** Strains and plasmids used in this study

674

675 **Table S2.** Oligonucleotides used in this study

| Primer    | Sequence                                              | Description                                                                                                                                     |
|-----------|-------------------------------------------------------|-------------------------------------------------------------------------------------------------------------------------------------------------|
| JOHE45233 | gtaacgccagggttttcccagtcacgacgCCAAA<br>TGTGTTTGCTATGTG | 5' primer to amplify 1 kb upstream <i>UGD1</i> for homologous recombination gene deletion. Includes homology to pGI3.                           |
| JOHE45085 | ctggccgctggttttaTTTGAATGGGGTTG<br>AGGGTA              | 3' primer to amplify 1 kb upstream <i>UGD1</i> for homologous recombination gene deletion. Includes homology to <i>NEO</i> .                    |
| JOHE45086 | TACCCTCAACCCCATTCAAAataaaa<br>cgacggccag              | 5' primer to amplify <i>NEO</i> for homologous recombination gene deletion of <i>UGD1</i> . Includes homology to <i>UGD1</i> upstream region.   |
| JOHE45087 | GTCGCCGGTACCGATAGTcaggaaa<br>cagctatgac               | 3' primer to amplify <i>NEO</i> for homologous recombination gene deletion of <i>UGD1</i> . Includes homology to <i>UGD1</i> downstream region. |
| JOHE45088 | gtcatagctgtttcctgACTATCGGTACC<br>GGCGAC               | 5' primer to amplify 1 kb downstream <i>UGD1</i> for homologous recombination gene deletion. Includes homology to <i>NEO</i> .                  |
| JOHE45234 | gcgataacaatttcacacaggaacagcCTC<br>ACGATTGCCTCATAAAC   | 3' primer to amplify 1 kb downstream <i>UGD1</i> for homologous recombination gene deletion. Includes homology to pGI3.                         |
| JOHE45303 | GCGTTGAAGTGGTAAGTG                                    | Internal 5' <i>UGD1</i> screening primer                                                                                                        |
| JOHE45304 | GACGATCTTGGAAGAGGTAG                                  | Internal 3' <i>UGD1</i> screening primer                                                                                                        |
| JOHE45335 | GTCCTCGACAACCTTCTTCAC                                 | Internal 5' <i>UXS1</i> screening primer                                                                                                        |
| JOHE45336 | CGGTGATAACCATAGGTC                                    | Internal 3' <i>UXS1</i> screening primer                                                                                                        |
| JOHE41579 | CTAACTCTACTACACCTCACGGCA                              | 5' <i>STE20a</i> screening primer                                                                                                               |
| JOHE41580 | CGCACTGCAAATAGATAAGTCTG                               | 3' <i>STE20a</i> screening primer                                                                                                               |
| JOHE41581 | GGCTGCAATCACAGCACCTTAC                                | 5' <i>STE20α</i> screening primer                                                                                                               |
| JOHE41582 | CTTCATGACATCACTCCCCTAT                                | 3' <i>STE20α</i> screening primer                                                                                                               |

676

Figure 1

bioRxiv preprint doi: <https://doi.org/10.1101/636928>; this version posted October 10, 2019. The copyright holder for this preprint (which was not certified by peer review) is the author/funder, who has granted bioRxiv a license to display the preprint in perpetuity. It is made available under aCC-BY-NC-ND 4.0 International license.

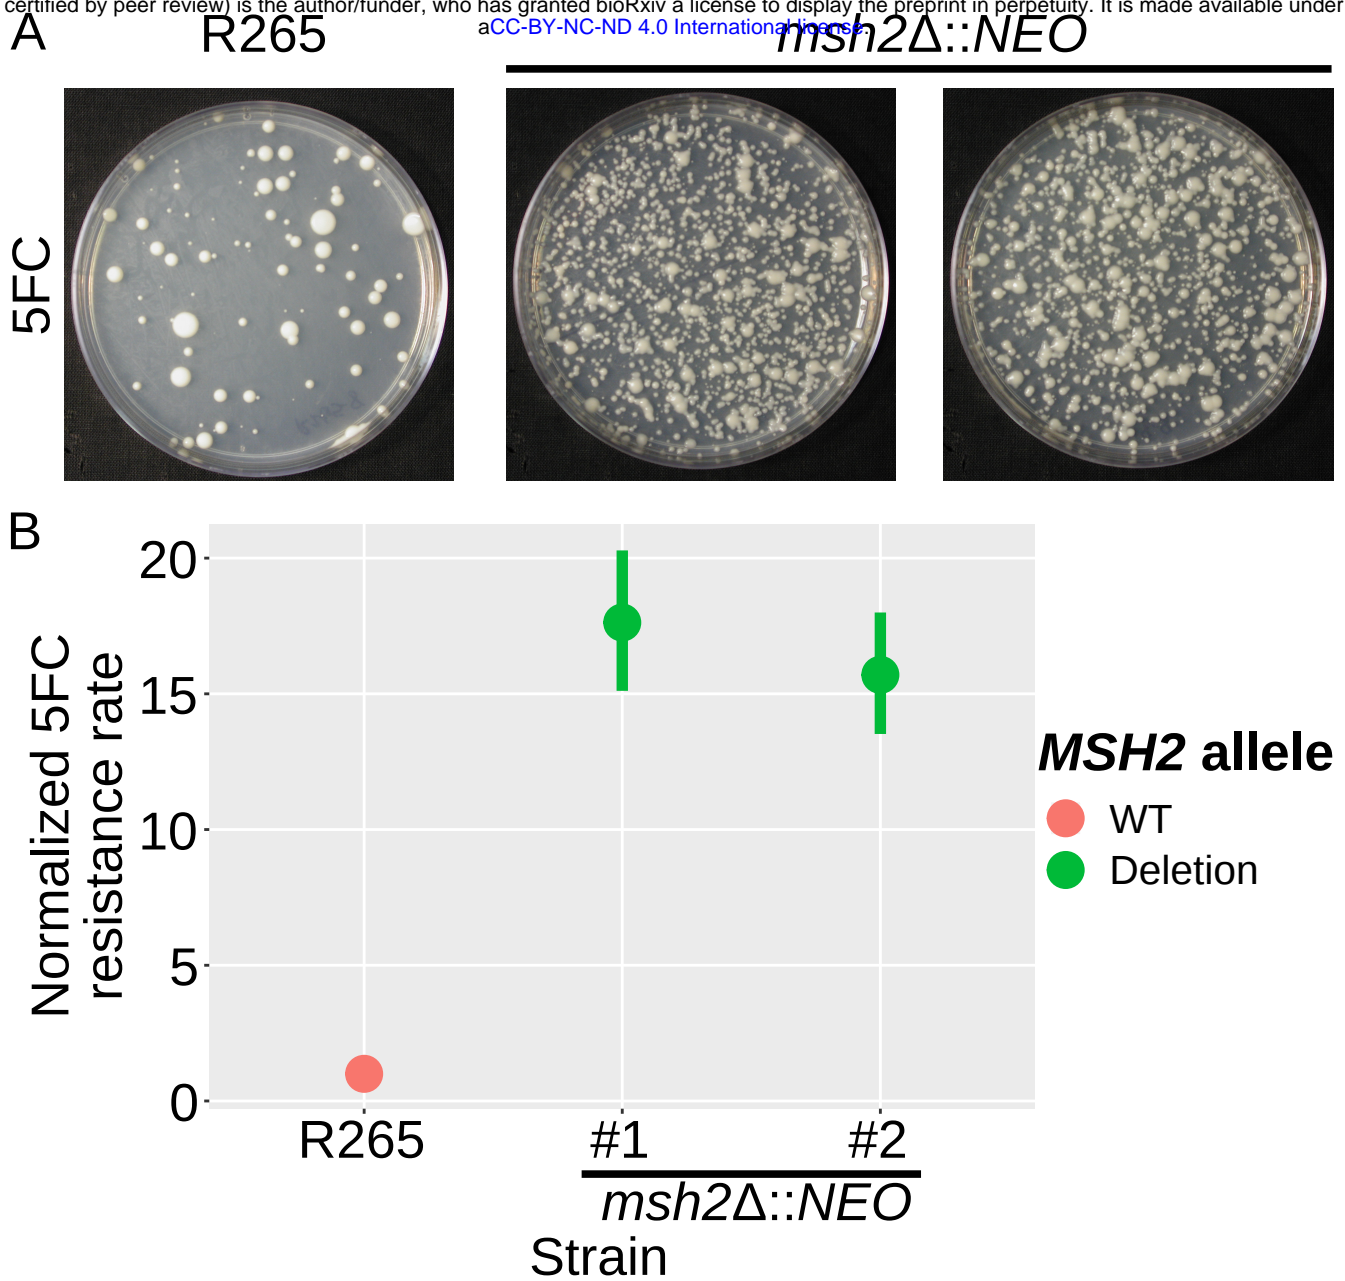

Figure 2

bioRxiv preprint doi: <https://doi.org/10.1101/636928>; this version posted October 10, 2019. The copyright holder for this preprint (which was not certified by peer review) is the author/funder, who has granted bioRxiv a license to display the preprint in perpetuity. It is made available under aCC-BY-NC-ND 4.0 International license.

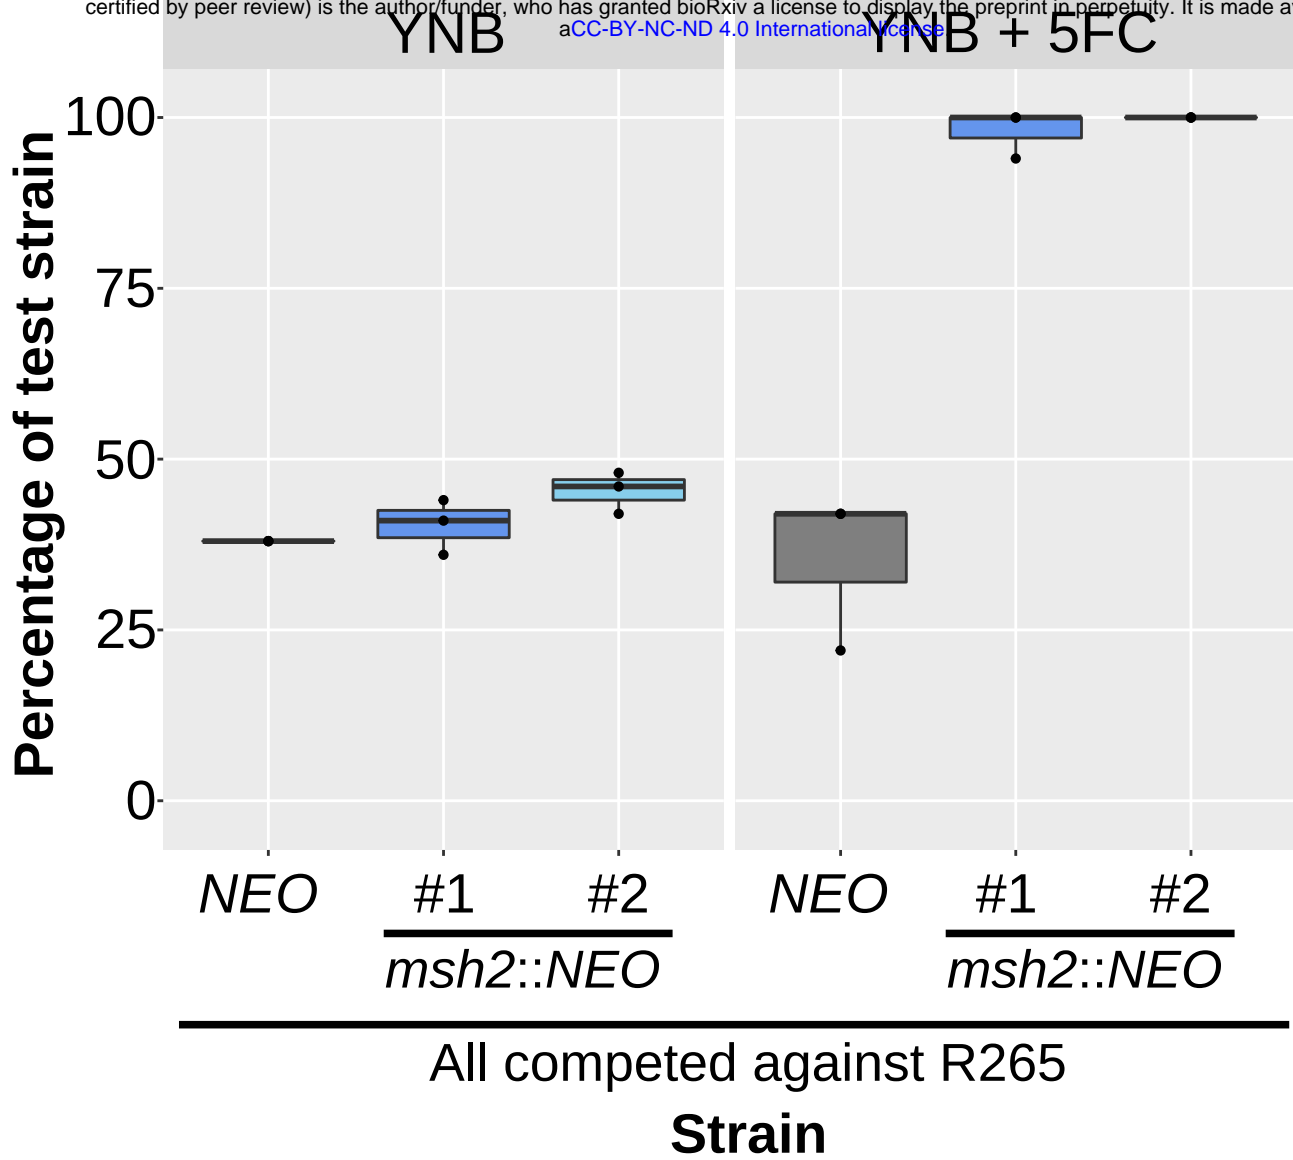

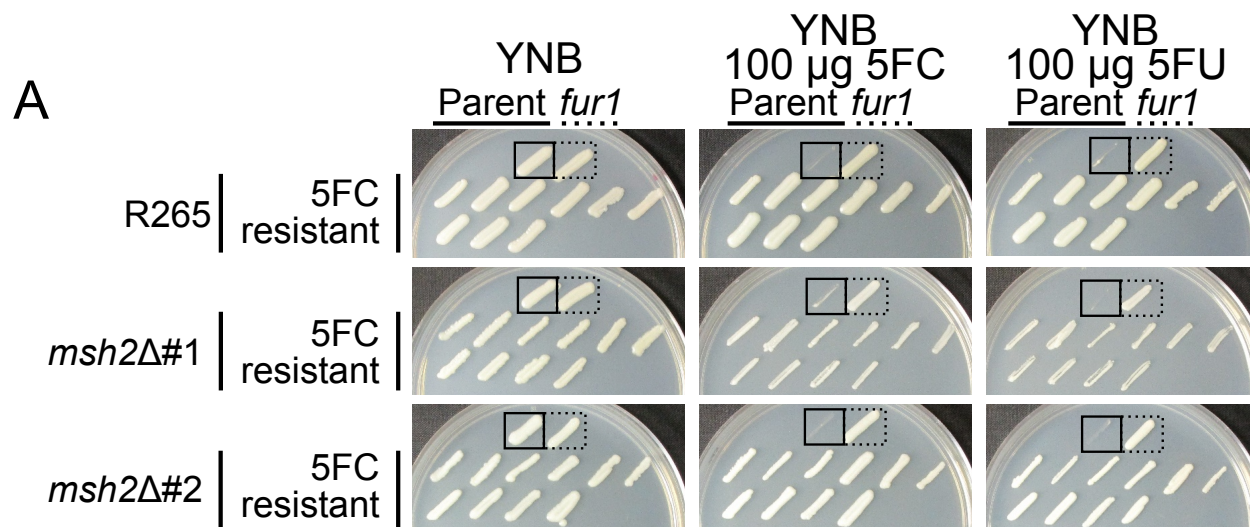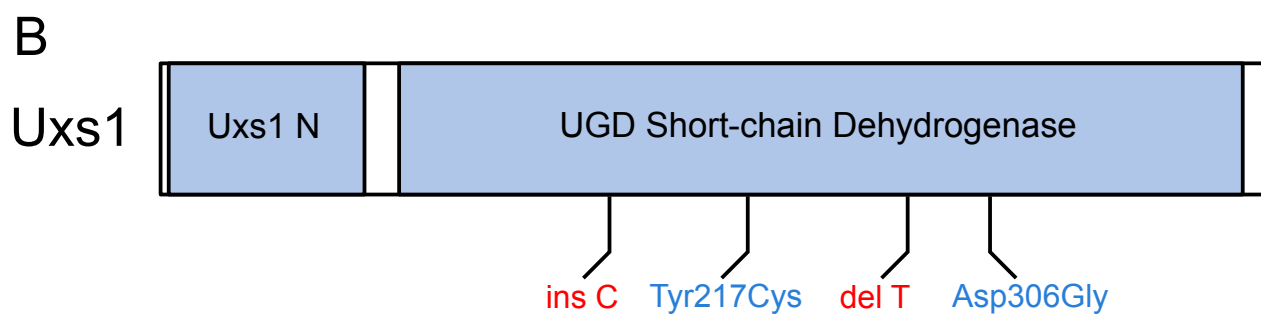



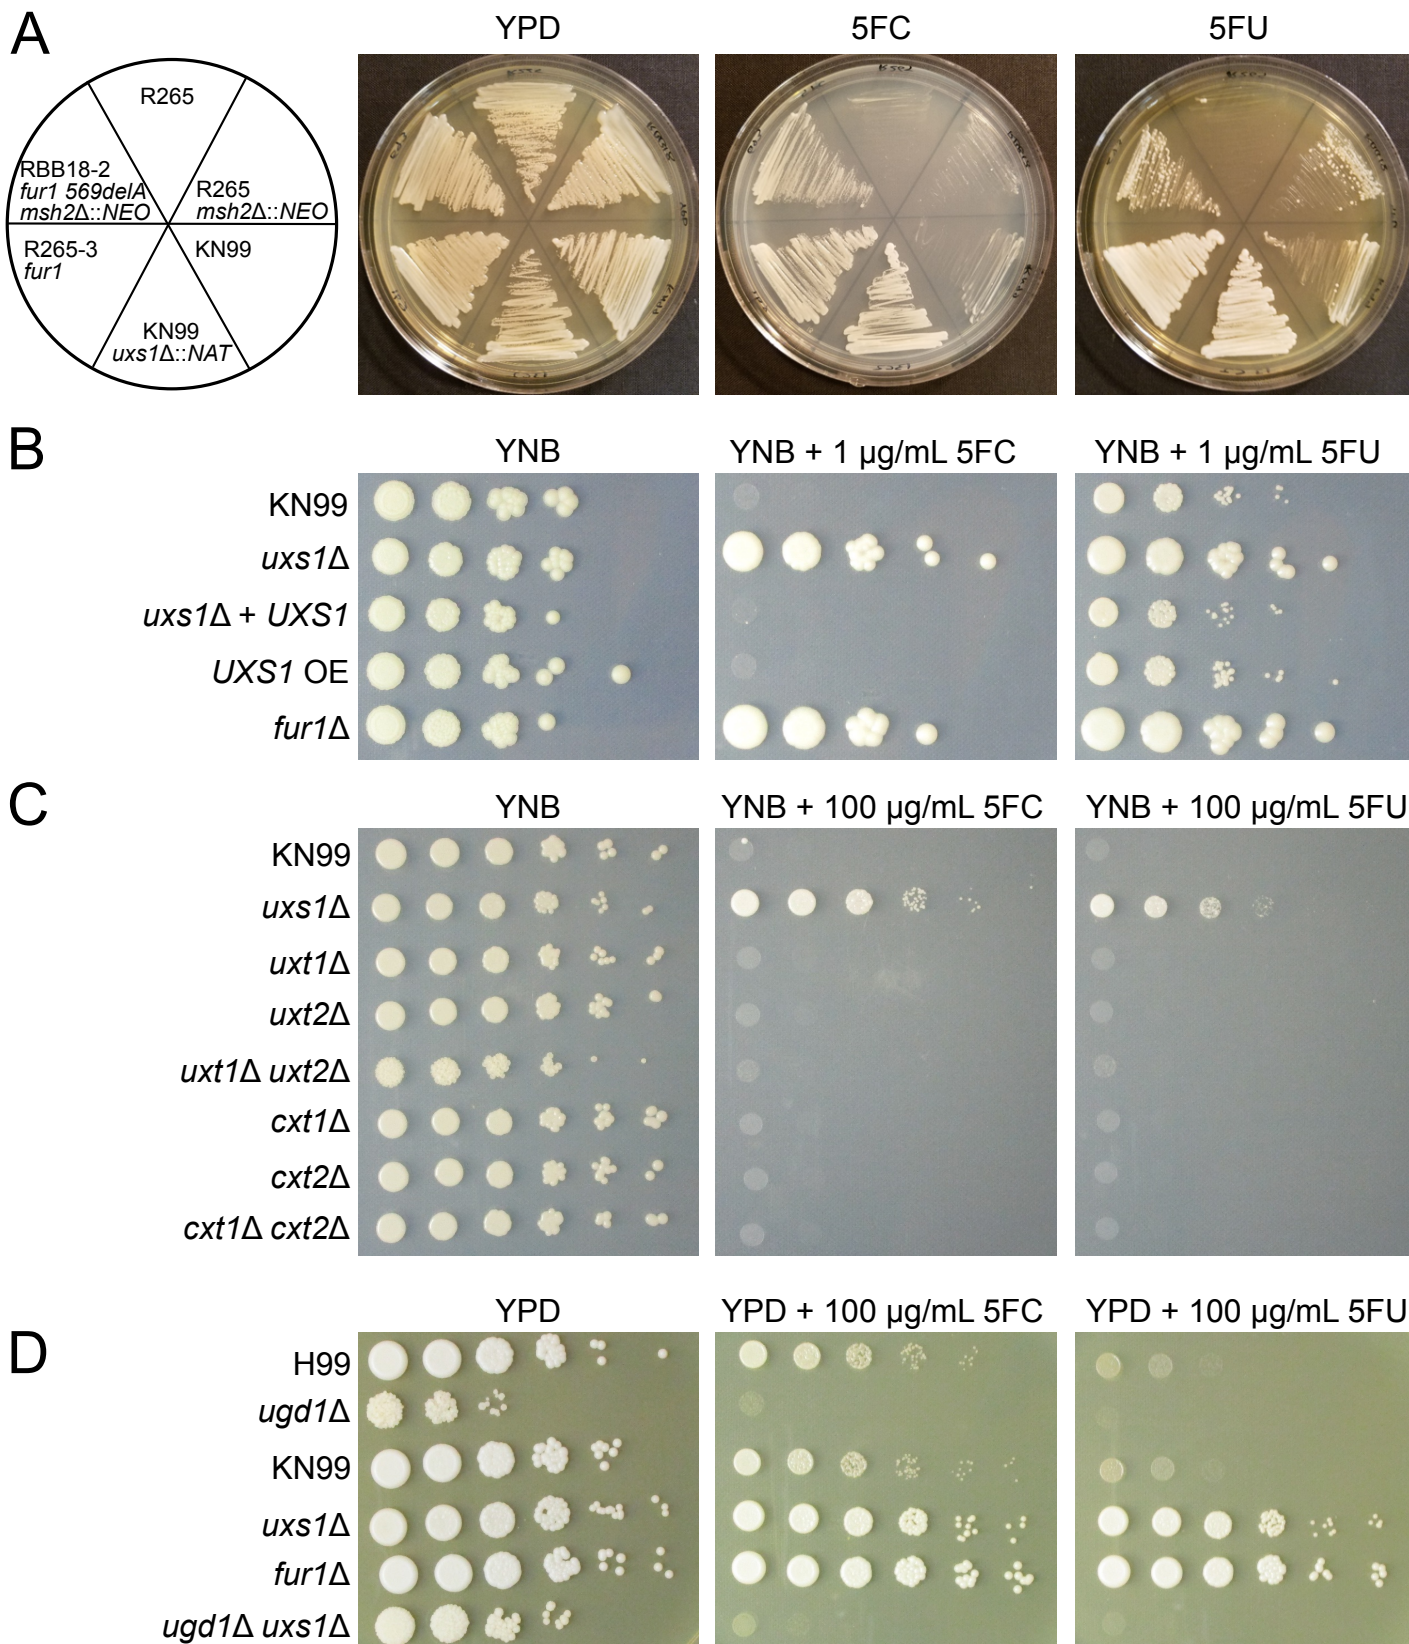

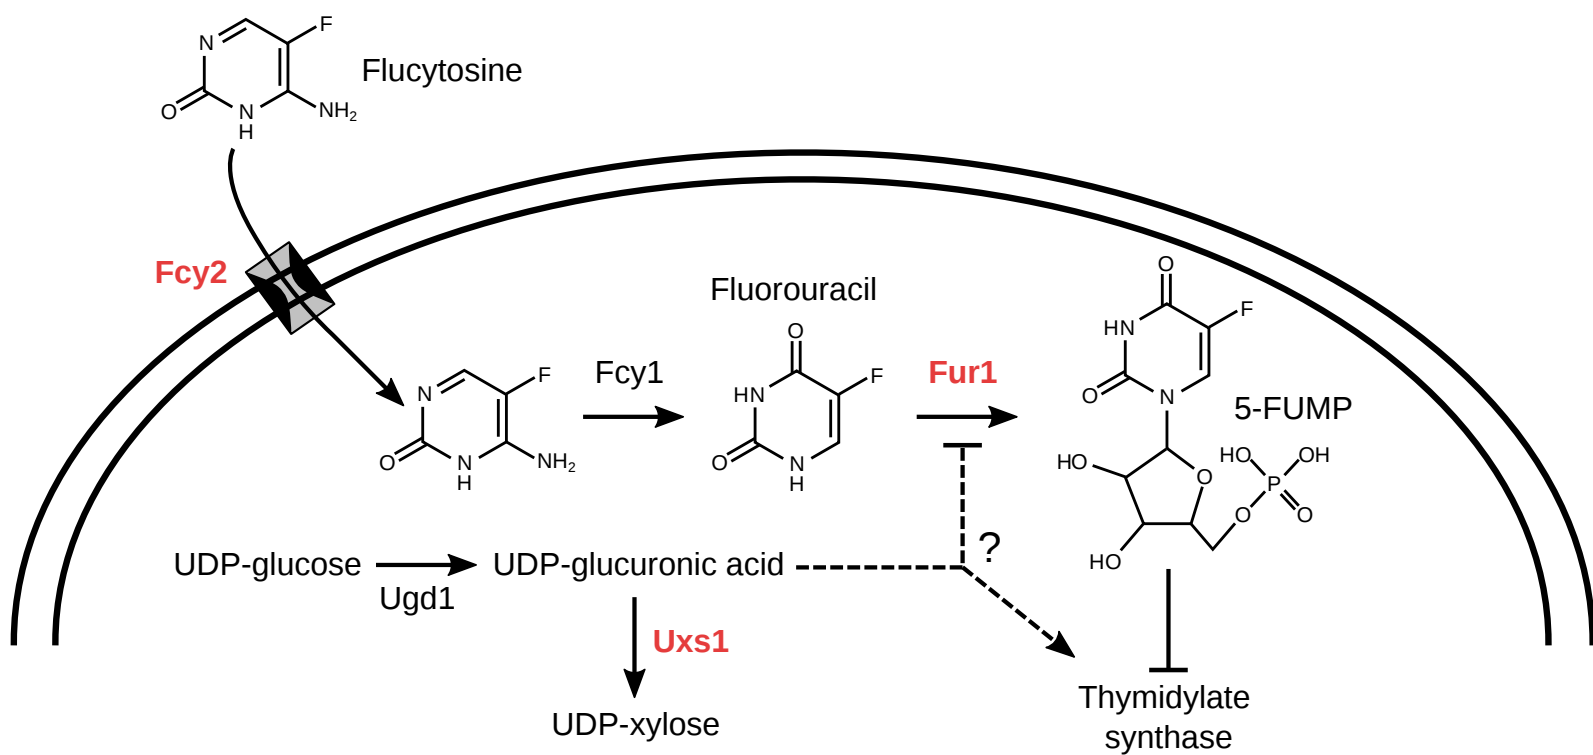

Source: https://www.biorxiv.org/content/10.1101/636928v2.full.pdf
